# Supplementary material
Source: PubMed Central journal article supplement (PMC6739197)

## Supplementary Material

### Population-based genome-wide association study of cognitive decline in older adults free of dementia: Identification of a novel locus for the attention domain

M. Ilyas Kamboh<sup>a,b,g\*</sup>, Kang-Hsien Fan<sup>a\*</sup>, Qi Yan<sup>c\*</sup>, Joanne C. Beer<sup>d\*</sup>, Xingbin Wang<sup>a</sup>, F. Yesim Demirci<sup>a</sup>, Beth E. Snitz<sup>e</sup>, Chung-Chou H. Chang<sup>d,f</sup>, Eleanor Feingold<sup>a,d</sup>, Mary Ganguli<sup>b,e,g</sup>

<sup>a</sup>*Department of Human Genetics, Graduate School of Public Health, University of Pittsburgh, Pittsburgh, PA, USA*

<sup>b</sup>*Department of Epidemiology, Graduate School of Public Health, University of Pittsburgh, Pittsburgh, PA, USA*

<sup>c</sup>*Department of Pediatrics, School of Medicine, University of Pittsburgh, Pittsburgh, PA, USA*

<sup>d</sup>*Department of Biostatistics, Graduate School of Public Health, University of Pittsburgh, Pittsburgh, PA, USA*

<sup>e</sup>*Department of Neurology, School of Medicine, University of Pittsburgh, Pittsburgh, PA, USA*

<sup>f</sup>*Department of Medicine, School of Medicine, University of Pittsburgh, Pittsburgh, PA, USA*

<sup>g</sup>*Department of Psychiatry, School of Medicine, University of Pittsburgh, Pittsburgh, PA, USA*

\*Contributed equally

**Table S1.** Association of *APOE*\*4 (rs429358) with Longitudinal Changes in all Cognitive Domains

|                                 | <b>Meta</b> |                 | <b>MyHAT</b> |                 | <b>MoVIES</b> |                 |
|---------------------------------|-------------|-----------------|--------------|-----------------|---------------|-----------------|
| <i>APOE</i> *4 Allele Frequency | 10.13%      |                 | 10.56%       |                 | 9.26%         |                 |
| <b>Domains of decline</b>       | Beta        | <i>P</i> -value | Beta         | <i>P</i> -value | Beta          | <i>P</i> -value |
| Attention/processing speed      | -0.03       | 6.85E-01        | -0.08        | 2.82E-01        | 0.09          | 4.07E-01        |
| Executive function              | -0.21       | 1.11E-03        | -0.27        | 5.09E-04        | -0.08         | 4.69E-01        |
| Language                        | -0.24       | 1.65E-04        | -0.30        | 8.52E-05        | -0.11         | 3.37E-01        |
| Memory                          | -0.29       | 7.18E-06        | -0.28        | 2.91E-04        | -0.30         | 8.05E-03        |
| Visuospatial ability            | -0.07       | 2.94E-01        | -0.05        | 5.68E-01        | -0.11         | 3.18E-01        |
| Global cognition                | -0.29       | 1.03E-05        | -0.32        | 5.76E-05        | -0.22         | 5.07E-02        |

**Table S2.1.** Association of Known AD Genes with Longitudinal Change in the Attention/Processing Speed Domain

| AD gene region           | Chr | Start bp  | End bp    | Total SNPs in region | # of SNPs <0.05 | Top SNP in the region | Position  | A1 | A2 | Beta  | P-value       |
|--------------------------|-----|-----------|-----------|----------------------|-----------------|-----------------------|-----------|----|----|-------|---------------|
| <i>CR1</i>               | 1   | 207669473 | 207815110 | 163                  | 1               | rs34720009            | 207755502 | A  | G  | 0.21  | 0.0116        |
| <i>BIN1</i>              | 2   | 127805599 | 127864903 | 175                  | 0               | rs934826              | 127825968 | A  | G  | -0.09 | 0.0704        |
| <i>INPP5D</i>            | 2   | 233743396 | 234116549 | 922                  | 32              | rs4973585             | 233819091 | T  | C  | -0.10 | 0.0096        |
| <i>MEF2C</i>             | 5   | 87962671  | 88199922  | 162                  | 0               | rs11744850            | 88071933  | G  | C  | 0.08  | 0.0657        |
| <b><i>HBEGF</i></b>      | 5   | 139712428 | 139726188 | 25                   | 17              | rs4150222             | 139719983 | A  | G  | -0.21 | <b>0.0001</b> |
| <i>HLA-DRB5/HLA-DRB1</i> | 6   | 32260758  | 32827628  | 15080                | 282             | rs28724893            | 32744440  | T  | C  | -0.11 | 0.0058        |
| <i>CD2AP</i>             | 6   | 47445525  | 47689757  | 601                  | 1               | rs28578494            | 47557301  | T  | C  | -0.20 | 0.0189        |
| <i>NME8</i>              | 7   | 37779996  | 37940002  | 398                  | 8               | chr7:37922209         | 37922209  | A  | G  | -0.21 | 0.0194        |
| <i>ZCWPW1</i>            | 7   | 99488030  | 100201661 | 760                  | 9               | rs73158413            | 99619540  | A  | T  | 0.15  | 0.0196        |
| <i>EPHA1</i>             | 7   | 143013219 | 143220540 | 454                  | 0               | rs34824368            | 143087432 | A  | G  | -0.09 | 0.0710        |
| <i>PTK2B</i>             | 8   | 27093814  | 27402439  | 625                  | 8               | rs1879187             | 27193566  | G  | A  | 0.11  | 0.0418        |
| <i>CLU</i>               | 8   | 27182996  | 27695349  | 1181                 | 9               | rs2640725             | 27413421  | G  | T  | -0.10 | 0.0106        |
| <i>ECHDC3</i>            | 10  | 11784356  | 11806065  | 54                   | 0               | rs71479374            | 11802364  | A  | G  | 0.12  | 0.1253        |
| <i>CELF1</i>             | 11  | 47185849  | 47870057  | 825                  | 36              | rs11039155            | 47280762  | A  | G  | -0.16 | 0.0073        |
| <i>MS4A6A</i>            | 11  | 59807748  | 60108441  | 465                  | 15              | rs77984124            | 60052618  | A  | G  | -0.23 | 0.0050        |
| <i>PICALM</i>            | 11  | 85566144  | 85780139  | 369                  | 9               | rs11603990            | 85592421  | C  | A  | 0.11  | 0.0097        |
| <i>SORL1</i>             | 11  | 121322912 | 121504471 | 191                  | 1               | rs58224948            | 121326693 | T  | C  | -0.19 | 0.0101        |
| <i>FERMT2</i>            | 14  | 53108605  | 53417815  | 396                  | 1               | rs35485994            | 53371779  | T  | C  | 0.17  | 0.0402        |
| <i>SLC24A4</i>           | 14  | 92790152  | 93155334  | 1018                 | 44              | rs17783612            | 92919112  | C  | T  | 0.22  | 0.0018        |
| <i>SCIMP</i>             | 17  | 5031687   | 5289132   | 508                  | 0               | rs2641257             | 5119918   | G  | A  | -0.10 | 0.0593        |
| <b><i>ABCA7</i></b>      | 19  | 840985    | 1301429   | 1130                 | 62              | rs35140707            | 1078297   | T  | C  | -0.28 | <b>0.0005</b> |
| <i>CASS4</i>             | 20  | 54967427  | 55111574  | 214                  | 4               | rs16979934            | 55026779  | C  | T  | -0.18 | 0.0242        |

**Table S2.2.** Association of Known AD Genes with Longitudinal Change in the Executive Function Domain

| AD gene region           | Chr | Start bp  | End bp    | Total SNPs in region | # of SNPs <0.05 | Top SNP in the region | Position  | A1 | A2 | Beta  | P-value       |
|--------------------------|-----|-----------|-----------|----------------------|-----------------|-----------------------|-----------|----|----|-------|---------------|
| <i>CR1</i>               | 1   | 207669473 | 207815110 | 163                  | 0               | rs11118157            | 207778319 | A  | C  | 0.08  | 0.0818        |
| <i>BIN1</i>              | 2   | 127805599 | 127864903 | 175                  | 0               | rs744368              | 127862653 | T  | G  | 0.07  | 0.1449        |
| <b><i>INPP5D</i></b>     | 2   | 233743396 | 234116549 | 922                  | 223             | rs7569827             | 234107070 | G  | A  | 0.15  | <b>0.0004</b> |
| <i>MEF2C</i>             | 5   | 87962671  | 88199922  | 162                  | 45              | rs62380364            | 88107337  | A  | C  | -0.11 | 0.0052        |
| <i>HBEGF</i>             | 5   | 139712428 | 139726188 | 25                   | 1               | rs11465446            | 139719135 | G  | A  | -0.12 | 0.0450        |
| <i>HLA-DRB5/HLA-DRB1</i> | 6   | 32260758  | 32827628  | 15080                | 328             | rs2859094             | 32700233  | G  | T  | 0.20  | 0.0012        |
| <i>CD2AP</i>             | 6   | 47445525  | 47689757  | 601                  | 0               | rs12661844            | 47578974  | T  | C  | 0.08  | 0.0766        |
| <i>NME8</i>              | 7   | 37779996  | 37940002  | 398                  | 1               | rs2598075             | 37872769  | T  | C  | 0.08  | 0.0454        |
| <b><i>ZCWPW1</i></b>     | 7   | 99488030  | 100201661 | 760                  | 155             | rs11558475            | 99654600  | G  | A  | -0.15 | <b>0.0006</b> |
| <i>EPHA1</i>             | 7   | 143013219 | 143220540 | 454                  | 35              | rs1880559             | 143198796 | C  | A  | 0.17  | 0.0027        |
| <i>PTK2B</i>             | 8   | 27093814  | 27402439  | 625                  | 59              | rs2278319             | 27308961  | T  | C  | -0.13 | 0.0034        |
| <i>CLU</i>               | 8   | 27182996  | 27695349  | 1181                 | 61              | rs2278319             | 27308961  | T  | C  | -0.13 | 0.0034        |
| <i>ECHDC3</i>            | 10  | 11784356  | 11806065  | 54                   | 0               | rs11257307            | 11800429  | G  | A  | -0.11 | 0.0829        |
| <i>CELF1</i>             | 11  | 47185849  | 47870057  | 825                  | 3               | chr11:4731485<br>5    | 47314855  | T  | C  | 0.20  | 0.0217        |
| <i>MS4A6A</i>            | 11  | 59807748  | 60108441  | 465                  | 2               | rs1286275             | 59817496  | G  | A  | 0.10  | 0.0464        |
| <i>PICALM</i>            | 11  | 85566144  | 85780139  | 369                  | 9               | rs80103299            | 85646050  | A  | G  | -0.19 | 0.0140        |
| <i>SORL1</i>             | 11  | 121322912 | 121504471 | 191                  | 6               | rs7118902             | 121440231 | A  | G  | -0.09 | 0.0386        |
| <i>FERMT2</i>            | 14  | 53108605  | 53417815  | 396                  | 15              | rs62005431            | 53175731  | G  | A  | 0.23  | 0.0094        |
| <i>SLC24A4</i>           | 14  | 92790152  | 93155334  | 1018                 | 18              | rs79363863            | 92792604  | T  | C  | -0.17 | 0.0098        |
| <i>SCIMP</i>             | 17  | 5031687   | 5289132   | 508                  | 22              | rs16954575            | 5283239   | C  | T  | 0.19  | 0.0059        |
| <b><i>ABCA7</i></b>      | 19  | 840985    | 1301429   | 1130                 | 61              | rs72618592            | 1226901   | T  | G  | 0.19  | <b>0.0003</b> |
| <i>CASS4</i>             | 20  | 54967427  | 55111574  | 214                  | 8               | rs6014718             | 54981233  | A  | G  | -0.12 | 0.0056        |

**Table S2.3.** Association of Known AD Genes with Longitudinal Change in the Language Domain

| AD gene region                  | Chr | Start bp  | End bp    | Total SNPs in region | # of SNPs <0.05 | Top SNP in the region | Position  | A1 | A2 | Beta  | <i>P</i> -value |
|---------------------------------|-----|-----------|-----------|----------------------|-----------------|-----------------------|-----------|----|----|-------|-----------------|
| <i>CR1</i>                      | 1   | 207669473 | 207815110 | 163                  | 15              | rs146793221           | 207735980 | T  | A  | 0.10  | 0.0198          |
| <i>BIN1</i>                     | 2   | 127805599 | 127864903 | 175                  | 22              | rs1060743             | 127826533 | G  | A  | -0.14 | 0.0015          |
| <i>INPP5D</i>                   | 2   | 233743396 | 234116549 | 922                  | 30              | rs6759973             | 234001575 | T  | C  | 0.23  | 0.0011          |
| <i>MEF2C</i>                    | 5   | 87962671  | 88199922  | 162                  | 0               | rs112862634           | 87970352  | C  | G  | 0.10  | 0.0686          |
| <i>HBEGF</i>                    | 5   | 139712428 | 139726188 | 25                   | 3               | rs4150231             | 139714947 | T  | C  | 0.19  | 0.0115          |
| <b><i>HLA-DRB5/HLA-DRB1</i></b> | 6   | 32260758  | 32827628  | 15080                | 418             | rs181549666           | 32482352  | A  | T  | -0.19 | <b>0.0004</b>   |
| <i>CD2AP</i>                    | 6   | 47445525  | 47689757  | 601                  | 36              | rs58586595            | 47500713  | T  | G  | 0.11  | 0.0184          |
| <i>NME8</i>                     | 7   | 37779996  | 37940002  | 398                  | 2               | rs62463308            | 37794629  | G  | A  | 0.19  | 0.0276          |
| <i>ZCWPW1</i>                   | 7   | 99488030  | 100201661 | 760                  | 201             | rs55839153            | 99752566  | A  | G  | -0.14 | 0.0045          |
| <i>EPHA1</i>                    | 7   | 143013219 | 143220540 | 454                  | 59              | rs73154208            | 143092664 | G  | C  | 0.17  | 0.0084          |
| <i>PTK2B</i>                    | 8   | 27093814  | 27402439  | 625                  | 104             | rs11994882            | 27261815  | A  | G  | 0.19  | 0.0035          |
| <i>CLU</i>                      | 8   | 27182996  | 27695349  | 1181                 | 112             | rs11994882            | 27261815  | A  | G  | 0.19  | 0.0035          |
| <i>ECHDC3</i>                   | 10  | 11784356  | 11806065  | 54                   | 0               | rs11558855            | 11784633  | T  | C  | -0.04 | 0.4153          |
| <i>CELF1</i>                    | 11  | 47185849  | 47870057  | 825                  | 21              | rs2291120             | 47237680  | C  | T  | 0.16  | 0.0090          |
| <i>MS4A6A</i>                   | 11  | 59807748  | 60108441  | 465                  | 25              | rs76608006            | 60021586  | A  | C  | -0.19 | 0.0311          |
| <i>PICALM</i>                   | 11  | 85566144  | 85780139  | 369                  | 1               | rs80103299            | 85646050  | A  | G  | -0.16 | 0.0406          |
| <i>SORL1</i>                    | 11  | 121322912 | 121504471 | 191                  | 0               | rs10790448            | 121495555 | A  | G  | -0.07 | 0.0684          |
| <i>FERMT2</i>                   | 14  | 53108605  | 53417815  | 396                  | 27              | rs12588928            | 53412752  | A  | G  | 0.13  | 0.0077          |
| <i>SLC24A4</i>                  | 14  | 92790152  | 93155334  | 1018                 | 73              | rs9323880             | 93129810  | T  | C  | 0.13  | 0.0016          |
| <i>SCIMP</i>                    | 17  | 5031687   | 5289132   | 508                  | 1               | rs6502859             | 5173631   | A  | G  | -0.17 | 0.0469          |
| <b><i>ABCA7</i></b>             | 19  | 840985    | 1301429   | 1130                 | 45              | rs2277746             | 1226772   | T  | C  | 0.19  | <b>0.0004</b>   |
| <i>CASS4</i>                    | 20  | 54967427  | 55111574  | 214                  | 0               | rs911163              | 54985113  | T  | A  | 0.07  | 0.0565          |

**Table S2.4.** Association of Known AD Genes with Longitudinal Change in the Memory Domain

| AD gene region           | Chr | Start bp  | End bp    | Total SNPs in region | # of SNPs <0.05 | Top SNP in the region | Position  | A1 | A2 | Beta  | P-value       |
|--------------------------|-----|-----------|-----------|----------------------|-----------------|-----------------------|-----------|----|----|-------|---------------|
| <i>CR1</i>               | 1   | 207669473 | 207815110 | 163                  | 13              | rs12075933            | 207675853 | G  | T  | 0.17  | 0.0033        |
| <i>BIN1</i>              | 2   | 127805599 | 127864903 | 175                  | 0               | rs72481904            | 127821499 | C  | T  | -0.08 | 0.0524        |
| <i>INPP5D</i>            | 2   | 233743396 | 234116549 | 922                  | 19              | rs12694918            | 233812632 | C  | T  | -0.15 | 0.0076        |
| <i>MEF2C</i>             | 5   | 87962671  | 88199922  | 162                  | 0               | rs76003436            | 88093272  | C  | T  | -0.08 | 0.1190        |
| <i>HBEGF</i>             | 5   | 139712428 | 139726188 | 25                   | 2               | rs113790245           | 139714984 | G  | A  | 0.21  | 0.0092        |
| <i>HLA-DRB5/HLA-DRB1</i> | 6   | 32260758  | 32827628  | 15080                | 169             | rs115833135           | 32489672  | A  | C  | -0.24 | 0.0012        |
| <i>CD2AP</i>             | 6   | 47445525  | 47689757  | 601                  | 4               | rs4711889             | 47606576  | C  | T  | -0.10 | 0.0293        |
| <i>NME8</i>              | 7   | 37779996  | 37940002  | 398                  | 23              | rs79712423            | 37801841  | G  | A  | -0.16 | 0.0030        |
| <i>ZCWPW1</i>            | 7   | 99488030  | 100201661 | 760                  | 71              | rs113261079           | 99937803  | G  | A  | -0.14 | 0.0061        |
| <b><i>EPHA1</i></b>      | 7   | 143013219 | 143220540 | 454                  | 89              | rs1949849             | 143178774 | G  | A  | -0.15 | <b>0.0005</b> |
| <b><i>PTK2B</i></b>      | 8   | 27093814  | 27402439  | 625                  | 123             | rs2280375             | 27317337  | A  | G  | 0.20  | <b>0.0008</b> |
| <b><i>CLU</i></b>        | 8   | 27182996  | 27695349  | 1181                 | 139             | rs2280375             | 27317337  | A  | G  | 0.20  | <b>0.0008</b> |
| <i>ECHDC3</i>            | 10  | 11784356  | 11806065  | 54                   | 0               | rs11257300            | 11786415  | G  | A  | 0.12  | 0.0850        |
| <i>CELF1</i>             | 11  | 47185849  | 47870057  | 825                  | 1               | rs11039155            | 47280762  | A  | G  | -0.12 | 0.0478        |
| <i>MS4A6A</i>            | 11  | 59807748  | 60108441  | 465                  | 2               | rs61900469            | 60084489  | A  | G  | 0.20  | 0.0147        |
| <i>PICALM</i>            | 11  | 85566144  | 85780139  | 369                  | 1               | rs80103299            | 85646050  | A  | G  | -0.18 | 0.0196        |
| <i>SORL1</i>             | 11  | 121322912 | 121504471 | 191                  | 20              | rs11604897            | 121423552 | T  | C  | 0.17  | 0.0081        |
| <i>FERMT2</i>            | 14  | 53108605  | 53417815  | 396                  | 3               | rs10151414            | 53165078  | T  | C  | -0.11 | 0.0087        |
| <b><i>SLC24A4</i></b>    | 14  | 92790152  | 93155334  | 1018                 | 70              | rs12590273            | 92934120  | C  | T  | -0.21 | <b>0.0001</b> |
| <i>SCIMP</i>             | 17  | 5031687   | 5289132   | 508                  | 4               | rs111783577           | 5144320   | C  | T  | 0.06  | 0.0249        |
| <i>ABCA7</i>             | 19  | 840985    | 1301429   | 1130                 | 115             | rs7252771             | 1201393   | A  | G  | 0.15  | 0.0020        |
| <i>CASS4</i>             | 20  | 54967427  | 55111574  | 214                  | 5               | rs16979884            | 54979035  | A  | G  | -0.18 | 0.0089        |

**Table S2.5.** Association of Known AD Genes with Longitudinal Change in the Visuospatial Domain

| AD gene region           | Chr | Start bp  | End bp    | Total SNPs in region | # of SNPs <0.05 | Top SNP in the region | Position  | A1 | A2 | Beta  | P-value        |
|--------------------------|-----|-----------|-----------|----------------------|-----------------|-----------------------|-----------|----|----|-------|----------------|
| <i>CR1</i>               | 1   | 207669473 | 207815110 | 163                  | 11              | rs34720009            | 207755502 | A  | G  | -0.27 | 0.0014         |
| <i>BIN1</i>              | 2   | 127805599 | 127864903 | 175                  | 0               | rs4663091             | 127818781 | G  | C  | 0.10  | 0.1013         |
| <i>INPP5D</i>            | 2   | 233743396 | 234116549 | 922                  | 37              | rs6759973             | 234001575 | T  | C  | 0.18  | 0.0137         |
| <i>MEF2C</i>             | 5   | 87962671  | 88199922  | 162                  | 13              | rs165944              | 88110363  | C  | T  | 0.15  | 0.0016         |
| <i>HBEGF</i>             | 5   | 139712428 | 139726188 | 25                   | 0               | rs1042184             | 139725961 | A  | G  | 0.14  | 0.0750         |
| <i>HLA-DRB5/HLA-DRB1</i> | 6   | 32260758  | 32827628  | 15080                | 54              | rs41270899            | 32629450  | G  | A  | 0.16  | 0.0110         |
| <i>CD2AP</i>             | 6   | 47445525  | 47689757  | 601                  | 413             | rs13196954            | 47611404  | G  | C  | 0.15  | 0.0010         |
| <i>NME8</i>              | 7   | 37779996  | 37940002  | 398                  | 9               | rs62463308            | 37794629  | G  | A  | 0.20  | 0.0356         |
| <i>ZCWPW1</i>            | 7   | 99488030  | 100201661 | 760                  | 75              | rs10255133            | 99982256  | A  | T  | 0.18  | 0.0018         |
| <b><i>EPHA1</i></b>      | 7   | 143013219 | 143220540 | 454                  | 86              | rs2949762             | 143213351 | A  | G  | -0.20 | <b>1.2E-05</b> |
| <i>PTK2B</i>             | 8   | 27093814  | 27402439  | 625                  | 92              | rs17368415            | 27223682  | A  | G  | -0.13 | 0.0021         |
| <i>CLU</i>               | 8   | 27182996  | 27695349  | 1181                 | 128             | rs17368415            | 27223682  | A  | G  | -0.13 | 0.0021         |
| <i>ECHDC3</i>            | 10  | 11784356  | 11806065  | 54                   | 0               | rs11257300            | 11786415  | G  | A  | 0.12  | 0.0990         |
| <i>CELF1</i>             | 11  | 47185849  | 47870057  | 825                  | 6               | rs6485761             | 47612949  | C  | T  | -0.34 | 0.0012         |
| <i>MS4A6A</i>            | 11  | 59807748  | 60108441  | 465                  | 2               | rs10897021            | 60044880  | A  | G  | 0.14  | 0.0252         |
| <i>PICALM</i>            | 11  | 85566144  | 85780139  | 369                  | 2               | rs2942821             | 85697685  | A  | G  | 0.11  | 0.0245         |
| <i>SORL1</i>             | 11  | 121322912 | 121504471 | 191                  | 4               | rs11822577            | 121402085 | C  | A  | -0.13 | 0.0278         |
| <i>FERMT2</i>            | 14  | 53108605  | 53417815  | 396                  | 0               | rs112898150           | 53140022  | A  | G  | 0.16  | 0.0586         |
| <b><i>SLC24A4</i></b>    | 14  | 92790152  | 93155334  | 1018                 | 42              | rs71430763            | 92977621  | A  | G  | 0.27  | <b>0.0003</b>  |
| <i>SCIMP</i>             | 17  | 5031687   | 5289132   | 508                  | 7               | rs3026101             | 5280440   | C  | T  | 0.10  | 0.0274         |
| <b><i>ABCA7</i></b>      | 19  | 840985    | 1301429   | 1130                 | 144             | rs3826957             | 1118774   | C  | G  | -0.14 | <b>0.0007</b>  |
| <i>CASS4</i>             | 20  | 54967427  | 55111574  | 214                  | 28              | rs34552628            | 55070268  | T  | A  | -0.10 | 0.0151         |

**Table S2.6.** Association of Known AD Genes with Longitudinal Change in Global Cognition

| AD gene region                  | Chr | Start bp  | End bp    | Total SNPs in region | # of SNPs <0.05 | Top SNP in the region | Position  | A1 | A2 | Beta  | P-value       |
|---------------------------------|-----|-----------|-----------|----------------------|-----------------|-----------------------|-----------|----|----|-------|---------------|
| <i>CR1</i>                      | 1   | 207669473 | 207815110 | 163                  | 0               | rs148143690           | 207716188 | G  | T  | 0.09  | 0.0561        |
| <i>BIN1</i>                     | 2   | 127805599 | 127864903 | 175                  | 0               | rs1060743             | 127826533 | G  | A  | -0.08 | 0.0547        |
| <i>INPP5D</i>                   | 2   | 233743396 | 234116549 | 922                  | 130             | rs10179304            | 234082911 | A  | T  | -0.14 | 0.0060        |
| <i>MEF2C</i>                    | 5   | 87962671  | 88199922  | 162                  | 0               | chr5:87969929         | 87969929  | A  | T  | 0.09  | 0.0967        |
| <i>HBEGF</i>                    | 5   | 139712428 | 139726188 | 25                   | 18              | rs4150222             | 139719983 | A  | G  | -0.17 | 0.0027        |
| <b><i>HLA-DRB5/HLA-DRB1</i></b> | 6   | 32260758  | 32827628  | 15080                | 443             | rs181549666           | 32482352  | A  | T  | -0.21 | <b>0.0003</b> |
| <i>CD2AP</i>                    | 6   | 47445525  | 47689757  | 601                  | 7               | rs9473147             | 47609592  | G  | A  | -0.10 | 0.0379        |
| <i>NME8</i>                     | 7   | 37779996  | 37940002  | 398                  | 12              | rs2718042             | 37786514  | A  | G  | -0.12 | 0.0270        |
| <i>ZCWPW1</i>                   | 7   | 99488030  | 100201661 | 760                  | 146             | rs147248866           | 99897475  | T  | C  | -0.15 | 0.0044        |
| <i>EPHA1</i>                    | 7   | 143013219 | 143220540 | 454                  | 89              | rs1949849             | 143178774 | G  | A  | -0.14 | 0.0015        |
| <b><i>PTK2B</i></b>             | 8   | 27093814  | 27402439  | 625                  | 179             | rs4733063             | 27302885  | G  | A  | -0.14 | <b>0.0009</b> |
| <b><i>CLU</i></b>               | 8   | 27182996  | 27695349  | 1181                 | 186             | rs4733063             | 27302885  | G  | A  | -0.14 | <b>0.0009</b> |
| <i>ECHDC3</i>                   | 10  | 11784356  | 11806065  | 54                   | 0               | rs12573515            | 11790453  | G  | A  | 0.06  | 0.1531        |
| <i>CELF1</i>                    | 11  | 47185849  | 47870057  | 825                  | 33              | rs11039155            | 47280762  | A  | G  | -0.14 | 0.0225        |
| <i>MS4A6A</i>                   | 11  | 59807748  | 60108441  | 465                  | 13              | rs76676346            | 60013547  | A  | G  | -0.21 | 0.0168        |
| <i>PICALM</i>                   | 11  | 85566144  | 85780139  | 369                  | 7               | rs80103299            | 85646050  | A  | G  | -0.19 | 0.0134        |
| <i>SORL1</i>                    | 11  | 121322912 | 121504471 | 191                  | 2               | rs3781824             | 121325062 | C  | T  | 0.13  | 0.0436        |
| <i>FERMT2</i>                   | 14  | 53108605  | 53417815  | 396                  | 7               | rs4901313             | 53387109  | T  | G  | 0.12  | 0.0305        |
| <b><i>SLC24A4</i></b>           | 14  | 92790152  | 93155334  | 1018                 | 49              | rs12590273            | 92934120  | C  | T  | -0.18 | <b>0.0009</b> |
| <i>SCIMP</i>                    | 17  | 5031687   | 5289132   | 508                  | 0               | rs72634030            | 5272580   | A  | C  | -0.15 | 0.0721        |
| <b><i>ABCA7</i></b>             | 19  | 840985    | 1301429   | 1130                 | 88              | rs72618592            | 1226901   | T  | G  | 0.20  | <b>0.0002</b> |
| <i>CASS4</i>                    | 20  | 54967427  | 55111574  | 214                  | 4               | rs16979884            | 54979035  | A  | G  | -0.18 | 0.0096        |



**Table S3.1.** Top SNPs ( $P < 1E-05$ ) for Longitudinal Change in the Attention/Processing Speed Domain

| SNP               | CHR       | BP       | A1 | A2 | Region     | GENE                 | MAF Meta | BETA Meta | P-value Meta | P-value Global |
|-------------------|-----------|----------|----|----|------------|----------------------|----------|-----------|--------------|----------------|
| rs17532412        | 13        | 52308103 | A  | C  | intronic   | WDFY2                | 0.17     | 0.28      | 3.37E-08     | 4.04E-04       |
| rs9535744         | 13        | 52311481 | C  | G  | intronic   | WDFY2                | 0.17     | 0.28      | 3.37E-08     | 4.04E-04       |
| rs9535749         | 13        | 52328844 | A  | T  | intronic   | WDFY2                | 0.17     | 0.28      | 3.37E-08     | 4.04E-04       |
| <b>*rs9535753</b> | 13        | 52335201 | C  | T  | UTR3       | WDFY2                | 0.17     | 0.28      | 3.37E-08     | 4.04E-04       |
| rs17532524        | 13        | 52316599 | A  | G  | intronic   | WDFY2                | 0.17     | 0.28      | 4.78E-08     | 4.82E-04       |
| rs17532936        | 13        | 52332745 | G  | A  | intronic   | WDFY2                | 0.17     | 0.28      | 4.78E-08     | 4.82E-04       |
| <b>*rs2296029</b> | <b>13</b> | 52335765 | T  | C  | UTR3       | WDFY2                | 0.17     | 0.28      | 4.78E-08     | 4.82E-04       |
| rs73199746        | 13        | 52323602 | A  | T  | intronic   | WDFY2                | 0.17     | 0.28      | 4.78E-08     | 4.82E-04       |
| rs9526793         | 13        | 52327020 | A  | G  | intronic   | WDFY2                | 0.17     | 0.28      | 4.78E-08     | 4.82E-04       |
| rs9526794         | 13        | 52330268 | C  | T  | intronic   | WDFY2                | 0.17     | 0.28      | 4.78E-08     | 4.82E-04       |
| rs9535743         | 13        | 52309076 | T  | C  | intronic   | WDFY2                | 0.17     | 0.28      | 4.78E-08     | 4.82E-04       |
| rs9535745         | 13        | 52312297 | G  | A  | intronic   | WDFY2                | 0.17     | 0.28      | 4.78E-08     | 4.82E-04       |
| rs9535747         | 13        | 52322184 | G  | C  | intronic   | WDFY2                | 0.17     | 0.28      | 4.78E-08     | 4.82E-04       |
| rs9535750         | 13        | 52330240 | C  | G  | intronic   | WDFY2                | 0.17     | 0.28      | 4.78E-08     | 4.82E-04       |
| rs9535751         | 13        | 52333057 | T  | C  | intronic   | WDFY2                | 0.17     | 0.28      | 4.78E-08     | 4.82E-04       |
| rs9535752         | 13        | 52333283 | A  | C  | intronic   | WDFY2                | 0.17     | 0.28      | 4.78E-08     | 4.82E-04       |
| rs9535756         | 13        | 52339750 | G  | C  | intergenic | WDFY2,DHRS12         | 0.17     | 0.28      | 4.78E-08     | 4.82E-04       |
| rs60757273        | 13        | 52304837 | G  | T  | intronic   | WDFY2                | 0.17     | 0.28      | 5.20E-08     | 4.40E-04       |
| rs73199734        | 13        | 52311956 | C  | T  | intronic   | WDFY2                | 0.17     | 0.28      | 5.24E-08     | 4.79E-04       |
| rs12427748        | 13        | 52319940 | C  | T  | intronic   | WDFY2                | 0.17     | 0.28      | 6.41E-08     | 3.51E-04       |
| rs9535755         | 13        | 52339143 | G  | C  | intergenic | WDFY2,DHRS12         | 0.17     | 0.28      | 8.18E-08     | 6.43E-04       |
| rs2296028         | 13        | 52345637 | C  | G  | intronic   | DHRS12               | 0.16     | 0.27      | 3.71E-07     | 7.57E-04       |
| rs41292776        | 13        | 52343004 | G  | A  | UTR3       | DHRS12               | 0.17     | 0.37      | 3.87E-07     | 6.92E-02       |
| rs77733744        | 13        | 52344004 | A  | G  | intronic   | DHRS12               | 0.16     | 0.26      | 5.47E-07     | 7.56E-04       |
| rs1403649         | 3         | 20574235 | C  | T  | intergenic | LOC101927829,VENTXP7 | 0.34     | -0.21     | 8.72E-07     | 2.60E-03       |
| rs17075907        | 13        | 52305464 | C  | T  | intronic   | WDFY2                | 0.16     | 0.26      | 9.43E-07     | 9.56E-04       |
| rs9535746         | 13        | 52317358 | G  | A  | intronic   | WDFY2                | 0.16     | 0.26      | 9.43E-07     | 9.56E-04       |
| rs9526786         | 13        | 52209422 | G  | A  | intronic   | WDFY2                | 0.18     | 0.24      | 9.82E-07     | 6.81E-03       |
| rs17597531        | 13        | 52222222 | T  | C  | intronic   | WDFY2                | 0.18     | 0.24      | 9.99E-07     | 4.92E-03       |
| rs9535739         | 13        | 52283300 | T  | C  | intronic   | WDFY2                | 0.18     | 0.24      | 9.99E-07     | 4.92E-03       |
| rs9812215         | 3         | 20575322 | C  | T  | intergenic | LOC101927829,VENTXP7 | 0.34     | -0.21     | 1.00E-06     | 2.93E-03       |
| rs9535734         | 13        | 52264383 | G  | A  | intronic   | WDFY2                | 0.18     | 0.24      | 1.04E-06     | 3.04E-03       |
| rs9535737         | 13        | 52274944 | G  | A  | intronic   | WDFY2                | 0.18     | 0.24      | 1.04E-06     | 4.01E-03       |
| rs9535738         | 13        | 52277693 | T  | G  | intronic   | WDFY2                | 0.18     | 0.24      | 1.04E-06     | 4.01E-03       |
| rs9535741         | 13        | 52284123 | G  | A  | intronic   | WDFY2                | 0.18     | 0.24      | 1.04E-06     | 4.01E-03       |
| rs1948903         | 3         | 20575110 | T  | C  | intergenic | LOC101927829,VENTXP7 | 0.34     | -0.21     | 1.04E-06     | 4.01E-03       |
| rs147486058       | 9         | 27241050 | T  | A  | intergenic | TEK,LINC00032        | 0.10     | 0.34      | 1.19E-06     | 1.53E-04       |
| rs6550542         | 3         | 20574017 | G  | A  | intergenic | LOC101927829,VENTXP7 | 0.34     | -0.21     | 1.74E-06     | 3.83E-03       |
| rs6808449         | 3         | 20575782 | A  | G  | intergenic | LOC101927829,VENTXP7 | 0.34     | -0.2      | 1.74E-06     | 2.26E-03       |

|             |    |           |   |   |            |                      |      |       |          |          |
|-------------|----|-----------|---|---|------------|----------------------|------|-------|----------|----------|
| rs7648188   | 3  | 20573947  | T | C | intergenic | LOC101927829,VENTXP7 | 0.34 | -0.2  | 2.01E-06 | 4.90E-03 |
| rs3908968   | 13 | 52180568  | A | G | intronic   | WDFY2                | 0.18 | 0.24  | 2.06E-06 | 6.20E-03 |
| rs9535715   | 13 | 52178945  | A | T | intronic   | WDFY2                | 0.18 | 0.24  | 2.06E-06 | 6.20E-03 |
| rs17597215  | 13 | 52188460  | A | G | intronic   | WDFY2                | 0.18 | 0.24  | 2.07E-06 | 7.77E-03 |
| rs4555048   | 13 | 52185855  | G | A | intronic   | WDFY2                | 0.18 | 0.24  | 2.07E-06 | 7.77E-03 |
| rs9526783   | 13 | 52192080  | T | A | intronic   | WDFY2                | 0.18 | 0.24  | 2.07E-06 | 7.77E-03 |
| rs66671632  | 8  | 143680772 | T | C | intergenic | BAI1,ARC             | 0.12 | -0.28 | 2.48E-06 | 4.46E-02 |
| rs7332702   | 13 | 101940643 | C | T | intronic   | NALCN                | 0.19 | -0.24 | 2.65E-06 | 7.78E-03 |
| rs9535714   | 13 | 52178166  | C | G | intronic   | WDFY2                | 0.18 | 0.23  | 4.29E-06 | 6.89E-03 |
| rs658424    | 13 | 101769546 | C | T | intronic   | NALCN                | 0.14 | -0.26 | 4.37E-06 | 1.39E-01 |
| rs6089150   | 20 | 30615413  | G | C | intronic   | CCM2L                | 0.08 | 0.33  | 5.50E-06 | 1.05E-01 |
| rs60320343  | 10 | 94537490  | T | A | intergenic | HHEX,EXOC6           | 0.11 | 0.3   | 6.86E-06 | 1.50E-02 |
| rs11606197  | 11 | 133051091 | C | T | intronic   | OPCML                | 0.16 | 0.25  | 6.91E-06 | 3.54E-01 |
| rs182734936 | 2  | 174151807 | T | C | intergenic | MLK7-AS1,CDCA7       | 0.07 | 0.38  | 7.25E-06 | 2.92E-05 |
| rs9895932   | 17 | 48849957  | T | C | intergenic | MIR8059,WFIKKN2      | 0.18 | -0.23 | 7.31E-06 | 6.22E-01 |
| rs6579316   | 20 | 30621098  | A | G | intergenic | CCM2L,HCK            | 0.13 | 0.26  | 7.96E-06 | 3.87E-02 |
| rs12211390  | 6  | 19702884  | C | T | intergenic | LOC101928519,ID4     | 0.47 | 0.18  | 8.80E-06 | 4.41E-03 |
| rs9535722   | 13 | 52207488  | A | C | intronic   | WDFY2                | 0.18 | 0.22  | 9.09E-06 | 1.03E-02 |
| rs11714432  | 3  | 126929153 | G | C | intergenic | C3orf56,LOC101927123 | 0.15 | 0.24  | 9.19E-06 | 8.37E-02 |
| rs11716691  | 3  | 126931173 | G | A | intergenic | C3orf56,LOC101927123 | 0.15 | 0.24  | 9.19E-06 | 8.37E-02 |
| rs1471660   | 3  | 126930188 | A | T | intergenic | C3orf56,LOC101927123 | 0.15 | 0.24  | 9.19E-06 | 8.37E-02 |
| rs4679351   | 3  | 126933242 | G | A | intergenic | C3orf56,LOC101927123 | 0.15 | 0.24  | 9.19E-06 | 8.37E-02 |
| rs9872136   | 3  | 126932984 | G | T | intergenic | C3orf56,LOC101927123 | 0.15 | 0.24  | 9.19E-06 | 8.40E-02 |
| rs6809319   | 3  | 126935129 | T | G | intergenic | C3orf56,LOC101927123 | 0.15 | 0.24  | 9.19E-06 | 8.37E-02 |
| rs4296778   | 5  | 34528915  | C | T | intergenic | C1QTNF3-AMACR,RAI14  | 0.35 | -0.18 | 9.41E-06 | 1.97E-01 |
| rs12146894  | 13 | 52326477  | G | A | intronic   | WDFY2                | 0.24 | 0.2   | 9.74E-06 | 8.85E-03 |
| rs2897944   | 13 | 52329831  | A | G | intronic   | WDFY2                | 0.24 | 0.2   | 9.74E-06 | 8.85E-03 |
| rs9535748   | 13 | 52328361  | G | A | intronic   | WDFY2                | 0.24 | 0.2   | 9.74E-06 | 8.85E-03 |
| rs4234283   | 3  | 126935726 | C | A | intergenic | C3orf56,LOC101927123 | 0.15 | 0.24  | 9.85E-06 | 7.47E-02 |
| rs11714341  | 3  | 126929088 | C | T | intergenic | C3orf56,LOC101927123 | 0.15 | 0.24  | 9.95E-06 | 8.37E-02 |
| rs75570795  | 8  | 143659938 | A | G | intergenic | BAI1,ARC             | 0.11 | -0.28 | 9.99E-06 | 2.70E-02 |

\* Bold font indicates genotyped SNPs with  $P < 5E-08$

**Table S3.2. Top SNPs ( $P < 1E-05$ ) for Longitudinal Change in the Executive Function Domain**

| SNP            | CHR | BP        | A1 | A2 | Region     | GENE                      | MAF<br>Meta | BETA<br>Meta | P-value<br>Meta | P-value<br>Global |
|----------------|-----|-----------|----|----|------------|---------------------------|-------------|--------------|-----------------|-------------------|
| rs10107150     | 8   | 84000400  | A  | T  | intergenic | SNX16,LINC01419           | 0.55        | 0.18         | 1.92E-06        | 4.02E-04          |
| chr:8:27776200 | 8   | 27776200  | C  | G  | intronic   | SCARA5                    | 0.48        | 0.24         | 2.21E-06        | 1.71E-04          |
| rs2546753      | 5   | 173204298 | A  | G  | intergenic | LOC101928136,LOC101928154 | 0.27        | -0.21        | 2.85E-06        | 3.84E-04          |
| rs6545794      | 2   | 60484909  | A  | G  | intergenic | LOC101927285,MIR4432      | 0.08        | -0.33        | 2.89E-06        | 2.51E-02          |
| rs17017706     | 2   | 60487902  | T  | G  | intergenic | LOC101927285,MIR4432      | 0.08        | -0.33        | 3.54E-06        | 4.92E-02          |
| rs12428019     | 13  | 43369700  | A  | T  | intergenic | FAM216B,EPSTI1            | 0.25        | -0.28        | 3.63E-06        | 5.13E-04          |
| rs12428973     | 13  | 43369701  | T  | A  | intergenic | FAM216B,EPSTI1            | 0.25        | -0.28        | 3.63E-06        | 5.13E-04          |
| rs111911665    | 2   | 60493335  | A  | G  | intergenic | LOC101927285,MIR4432      | 0.08        | -0.33        | 4.35E-06        | 2.88E-02          |
| rs10004897     | 4   | 84312759  | A  | G  | intergenic | HPSE,HELQ                 | 0.17        | 0.25         | 4.36E-06        | 6.32E-03          |
| rs13104478     | 4   | 84301323  | A  | G  | intergenic | HPSE,HELQ                 | 0.18        | 0.24         | 4.37E-06        | 2.30E-02          |
| rs34393106     | 4   | 4088636   | A  | C  | intergenic | FAM86EP,OTOP1             | 0.58        | 0.28         | 4.41E-06        | 1.53E-03          |
| rs6843371      | 4   | 84299447  | G  | A  | intergenic | HPSE,HELQ                 | 0.18        | 0.24         | 5.55E-06        | 2.85E-02          |
| rs6818482      | 4   | 84308661  | G  | T  | intergenic | HPSE,HELQ                 | 0.18        | 0.24         | 5.65E-06        | 3.50E-02          |
| rs12237894     | 9   | 74299640  | C  | G  | UTR3       | TMEM2                     | 0.12        | 0.28         | 5.73E-06        | 9.81E-03          |
| rs72960925     | 2   | 60502433  | T  | C  | intergenic | LOC101927285,MIR4432      | 0.08        | -0.32        | 5.75E-06        | 2.27E-02          |
| rs907574       | 2   | 60503230  | A  | G  | intergenic | LOC101927285,MIR4432      | 0.08        | -0.32        | 5.75E-06        | 2.27E-02          |
| rs11943334     | 4   | 84308183  | G  | A  | intergenic | HPSE,HELQ                 | 0.18        | 0.24         | 5.77E-06        | 3.57E-02          |
| rs4079618      | 2   | 60504816  | C  | G  | intergenic | LOC101927285,MIR4432      | 0.08        | -0.32        | 6.61E-06        | 2.99E-02          |
| rs58593843     | 2   | 60499463  | A  | G  | intergenic | LOC101927285,MIR4432      | 0.08        | -0.32        | 6.68E-06        | 2.75E-02          |
| rs6822815      | 4   | 84307262  | C  | G  | intergenic | HPSE,HELQ                 | 0.18        | 0.24         | 6.83E-06        | 4.17E-02          |
| rs4693618      | 4   | 84297853  | G  | A  | intergenic | HPSE,HELQ                 | 0.18        | 0.24         | 6.91E-06        | 2.96E-02          |
| rs6831180      | 4   | 84304734  | T  | C  | intergenic | HPSE,HELQ                 | 0.18        | 0.23         | 7.28E-06        | 3.46E-02          |
| rs6558570      | 8   | 1932654   | T  | C  | intronic   | KBTBD11                   | 0.43        | 0.19         | 8.88E-06        | 2.73E-05          |
| rs10869051     | 9   | 74294497  | C  | G  | intergenic | TRPM3,TMEM2               | 0.13        | 0.26         | 9.59E-06        | 2.31E-02          |
| rs9526788      | 13  | 52263834  | G  | A  | intronic   | WDFY2                     | 0.18        | 0.23         | 9.60E-06        | 7.26E-03          |
| rs4921111      | 5   | 159609114 | A  | T  | intergenic | PWWP2A,FABP6              | 0.55        | 0.17         | 9.75E-06        | 9.21E-04          |

**Table S3.3.** Top SNPs ( $P < 1E-05$ ) for Longitudinal Change in the Language Domain

| SNP         | CHR | BP        | A1 | A2 | Region     | GENE                 | MAF<br>Meta | BETA<br>Meta | P-value<br>Meta | P-value<br>Global |
|-------------|-----|-----------|----|----|------------|----------------------|-------------|--------------|-----------------|-------------------|
| rs13013766  | 2   | 218829527 | C  | G  | intergenic | TNS1,CXCR2P1         | 0.11        | -0.37        | 1.65E-07        | 1.07E-04          |
| rs202024188 | 3   | 36128605  | C  | G  | intergenic | ARPP21,STAC          | 0.28        | -0.24        | 2.83E-07        | 1.49E-05          |
| rs147655505 | 3   | 36125614  | A  | G  | intergenic | ARPP21,STAC          | 0.36        | -0.21        | 5.33E-07        | 2.68E-05          |
| rs141005242 | 4   | 122608258 | T  | C  | intronic   | ANXA5                | 0.08        | 0.38         | 5.40E-07        | 5.26E-03          |
| rs13071179  | 3   | 36137161  | G  | C  | intergenic | ARPP21,STAC          | 0.36        | -0.21        | 5.47E-07        | 2.34E-05          |
| rs34165897  | 3   | 36136938  | G  | A  | intergenic | ARPP21,STAC          | 0.36        | -0.21        | 5.47E-07        | 2.34E-05          |
| rs145360217 | 3   | 36125613  | C  | T  | intergenic | ARPP21,STAC          | 0.36        | -0.21        | 5.64E-07        | 2.66E-05          |
| rs11129687  | 3   | 36115732  | C  | G  | intergenic | ARPP21,STAC          | 0.36        | -0.21        | 5.87E-07        | 3.91E-05          |
| rs189108597 | 3   | 36126700  | C  | A  | intergenic | ARPP21,STAC          | 0.36        | -0.21        | 5.89E-07        | 2.58E-05          |
| rs4678833   | 3   | 36132630  | G  | A  | intergenic | ARPP21,STAC          | 0.36        | -0.21        | 5.89E-07        | 2.58E-05          |
| rs77171313  | 3   | 36129256  | G  | A  | intergenic | ARPP21,STAC          | 0.36        | -0.21        | 5.89E-07        | 2.58E-05          |
| rs78580948  | 3   | 36127467  | T  | C  | intergenic | ARPP21,STAC          | 0.36        | -0.21        | 5.89E-07        | 2.58E-05          |
| rs10511179  | 3   | 100058466 | G  | C  | intronic   | NIT2                 | 0.54        | 0.19         | 6.20E-07        | 7.91E-05          |
| rs1901398   | 3   | 36114324  | G  | A  | intergenic | ARPP21,STAC          | 0.36        | -0.21        | 6.21E-07        | 4.16E-05          |
| rs12492669  | 3   | 36135961  | T  | C  | intergenic | ARPP21,STAC          | 0.36        | -0.2         | 6.30E-07        | 2.78E-05          |
| rs139027644 | 3   | 36128730  | T  | G  | intergenic | ARPP21,STAC          | 0.36        | -0.2         | 6.30E-07        | 2.78E-05          |
| rs7227896   | 18  | 76535996  | C  | A  | intergenic | LINC01029,SALL3      | 0.17        | -0.27        | 6.68E-07        | 8.98E-04          |
| rs11252279  | 10  | 4065810   | C  | G  | intergenic | MIR6078,LOC101927964 | 0.53        | 0.19         | 6.84E-07        | 4.22E-06          |
| rs36175598  | 3   | 36145915  | C  | T  | intergenic | ARPP21,STAC          | 0.33        | -0.22        | 7.19E-07        | 4.50E-05          |
| rs78366579  | 3   | 36145920  | G  | T  | intergenic | ARPP21,STAC          | 0.33        | -0.22        | 7.19E-07        | 4.50E-05          |
| rs13067614  | 3   | 36122348  | C  | T  | intergenic | ARPP21,STAC          | 0.37        | -0.2         | 7.83E-07        | 3.07E-05          |
| rs11129692  | 3   | 36153431  | T  | C  | intergenic | ARPP21,STAC          | 0.36        | -0.2         | 8.70E-07        | 3.81E-05          |
| rs13018687  | 2   | 218829678 | A  | G  | intergenic | TNS1,CXCR2P1         | 0.11        | -0.34        | 9.24E-07        | 2.49E-05          |
| rs11129694  | 3   | 36154191  | G  | T  | intergenic | ARPP21,STAC          | 0.36        | -0.2         | 9.30E-07        | 4.10E-05          |
| rs11717566  | 3   | 36134591  | C  | T  | intergenic | ARPP21,STAC          | 0.36        | -0.2         | 9.40E-07        | 2.90E-05          |
| rs1925531   | 10  | 20915085  | A  | T  | intergenic | MIR4675,NEBL         | 0.55        | 0.21         | 1.02E-06        | 7.40E-08          |
| rs35534011  | 3   | 36159045  | T  | C  | intergenic | ARPP21,STAC          | 0.36        | -0.2         | 1.09E-06        | 4.42E-05          |
| rs71614151  | 3   | 36141071  | A  | C  | intergenic | ARPP21,STAC          | 0.36        | -0.2         | 1.10E-06        | 1.14E-05          |
| rs71614152  | 3   | 36141105  | G  | A  | intergenic | ARPP21,STAC          | 0.36        | -0.2         | 1.10E-06        | 1.14E-05          |
| rs6877034   | 5   | 53702584  | C  | G  | intergenic | ARL15,HSPB3          | 0.54        | 0.22         | 1.23E-06        | 7.72E-04          |
| rs10978143  | 9   | 9971410   | A  | G  | intronic   | PTPRD                | 0.26        | -0.22        | 1.36E-06        | 2.30E-04          |
| rs35638311  | 2   | 218830685 | A  | G  | intergenic | TNS1,CXCR2P1         | 0.10        | -0.32        | 1.36E-06        | 1.58E-05          |
| rs4678836   | 3   | 36138227  | A  | G  | intergenic | ARPP21,STAC          | 0.37        | -0.2         | 1.42E-06        | 4.74E-05          |
| rs13076624  | 3   | 36158708  | C  | T  | intergenic | ARPP21,STAC          | 0.37        | -0.2         | 1.46E-06        | 5.88E-05          |
| rs4678846   | 3   | 36158249  | C  | A  | intergenic | ARPP21,STAC          | 0.37        | -0.2         | 1.46E-06        | 5.88E-05          |
| rs201998488 | 3   | 36129696  | G  | A  | intergenic | ARPP21,STAC          | 0.35        | -0.2         | 1.52E-06        | 1.07E-04          |
| rs12638805  | 3   | 36170841  | C  | G  | intergenic | ARPP21,STAC          | 0.36        | -0.2         | 1.70E-06        | 5.11E-05          |
| rs13088087  | 3   | 36139545  | G  | A  | intergenic | ARPP21,STAC          | 0.37        | -0.2         | 1.73E-06        | 5.47E-05          |
| rs2382087   | 9   | 9960537   | A  | G  | intronic   | PTPRD                | 0.38        | -0.19        | 1.74E-06        | 3.31E-03          |
| rs13018351  | 2   | 218829609 | A  | C  | intergenic | TNS1,CXCR2P1         | 0.11        | -0.34        | 1.76E-06        | 2.41E-04          |

|            |    |          |   |   |            |                 |      |       |          |          |
|------------|----|----------|---|---|------------|-----------------|------|-------|----------|----------|
| rs7234784  | 18 | 76535489 | T | C | intergenic | LINC01029,SALL3 | 0.17 | -0.26 | 1.77E-06 | 8.17E-04 |
| rs7089445  | 10 | 30013103 | T | G | intronic   | SVIL            | 0.31 | 0.2   | 1.79E-06 | 3.88E-03 |
| rs35195707 | 3  | 36170588 | A | C | intergenic | ARPP21,STAC     | 0.36 | -0.2  | 1.82E-06 | 5.48E-05 |
| rs13058863 | 3  | 36172026 | A | G | intergenic | ARPP21,STAC     | 0.36 | -0.2  | 1.82E-06 | 5.76E-05 |
| rs5012697  | 3  | 36179245 | G | A | intergenic | ARPP21,STAC     | 0.36 | -0.2  | 1.82E-06 | 5.76E-05 |
| rs10510675 | 3  | 36148516 | T | C | intergenic | ARPP21,STAC     | 0.37 | -0.2  | 1.84E-06 | 6.04E-05 |
| rs10510676 | 3  | 36148866 | A | G | intergenic | ARPP21,STAC     | 0.37 | -0.2  | 1.84E-06 | 6.04E-05 |
| rs10780023 | 3  | 36152962 | A | C | intergenic | ARPP21,STAC     | 0.37 | -0.2  | 1.84E-06 | 6.04E-05 |
| rs10865870 | 3  | 36152157 | G | T | intergenic | ARPP21,STAC     | 0.37 | -0.2  | 1.84E-06 | 6.04E-05 |
| rs10865871 | 3  | 36152176 | A | G | intergenic | ARPP21,STAC     | 0.37 | -0.2  | 1.84E-06 | 6.04E-05 |
| rs10865872 | 3  | 36152237 | A | G | intergenic | ARPP21,STAC     | 0.37 | -0.2  | 1.84E-06 | 6.04E-05 |
| rs11129693 | 3  | 36154190 | T | C | intergenic | ARPP21,STAC     | 0.37 | -0.2  | 1.84E-06 | 6.04E-05 |
| rs11708406 | 3  | 36155009 | C | G | intergenic | ARPP21,STAC     | 0.37 | -0.2  | 1.84E-06 | 6.04E-05 |
| rs11720858 | 3  | 36153779 | C | A | intergenic | ARPP21,STAC     | 0.37 | -0.2  | 1.84E-06 | 6.04E-05 |
| rs11720937 | 3  | 36153983 | G | A | intergenic | ARPP21,STAC     | 0.37 | -0.2  | 1.84E-06 | 6.04E-05 |
| rs12488543 | 3  | 36150742 | T | C | intergenic | ARPP21,STAC     | 0.37 | -0.2  | 1.84E-06 | 6.04E-05 |
| rs12489549 | 3  | 36151949 | A | G | intergenic | ARPP21,STAC     | 0.37 | -0.2  | 1.84E-06 | 6.04E-05 |
| rs12639250 | 3  | 36153742 | G | A | intergenic | ARPP21,STAC     | 0.37 | -0.2  | 1.84E-06 | 6.04E-05 |
| rs13067611 | 3  | 36148449 | G | A | intergenic | ARPP21,STAC     | 0.37 | -0.2  | 1.84E-06 | 6.04E-05 |
| rs13068567 | 3  | 36148763 | C | G | intergenic | ARPP21,STAC     | 0.37 | -0.2  | 1.84E-06 | 6.04E-05 |
| rs13072328 | 3  | 36154647 | T | C | intergenic | ARPP21,STAC     | 0.37 | -0.2  | 1.84E-06 | 6.04E-05 |
| rs13072340 | 3  | 36154673 | T | C | intergenic | ARPP21,STAC     | 0.37 | -0.2  | 1.84E-06 | 6.04E-05 |
| rs13079004 | 3  | 36156020 | G | A | intergenic | ARPP21,STAC     | 0.37 | -0.2  | 1.84E-06 | 6.04E-05 |
| rs13079179 | 3  | 36156044 | T | C | intergenic | ARPP21,STAC     | 0.37 | -0.2  | 1.84E-06 | 6.04E-05 |
| rs13079225 | 3  | 36156154 | C | A | intergenic | ARPP21,STAC     | 0.37 | -0.2  | 1.84E-06 | 6.04E-05 |
| rs13079532 | 3  | 36156214 | T | C | intergenic | ARPP21,STAC     | 0.37 | -0.2  | 1.84E-06 | 6.04E-05 |
| rs13079830 | 3  | 36156216 | A | G | intergenic | ARPP21,STAC     | 0.37 | -0.2  | 1.84E-06 | 6.04E-05 |
| rs13086514 | 3  | 36151782 | T | C | intergenic | ARPP21,STAC     | 0.37 | -0.2  | 1.84E-06 | 6.04E-05 |
| rs13095291 | 3  | 36154712 | C | T | intergenic | ARPP21,STAC     | 0.37 | -0.2  | 1.84E-06 | 6.04E-05 |
| rs13098664 | 3  | 36153834 | G | A | intergenic | ARPP21,STAC     | 0.37 | -0.2  | 1.84E-06 | 6.04E-05 |
| rs13099825 | 3  | 36147255 | G | A | intergenic | ARPP21,STAC     | 0.37 | -0.2  | 1.84E-06 | 6.04E-05 |
| rs1449992  | 3  | 36155346 | G | T | intergenic | ARPP21,STAC     | 0.37 | -0.2  | 1.84E-06 | 6.04E-05 |
| rs17034235 | 3  | 36149523 | A | T | intergenic | ARPP21,STAC     | 0.37 | -0.2  | 1.84E-06 | 6.04E-05 |
| rs2122390  | 3  | 36149974 | A | G | intergenic | ARPP21,STAC     | 0.37 | -0.2  | 1.84E-06 | 6.04E-05 |
| rs2122392  | 3  | 36152536 | T | C | intergenic | ARPP21,STAC     | 0.37 | -0.2  | 1.84E-06 | 6.04E-05 |
| rs2167131  | 3  | 36152677 | C | A | intergenic | ARPP21,STAC     | 0.37 | -0.2  | 1.84E-06 | 6.04E-05 |
| rs34167736 | 3  | 36149795 | G | A | intergenic | ARPP21,STAC     | 0.37 | -0.2  | 1.84E-06 | 6.04E-05 |
| rs34894908 | 3  | 36144617 | G | A | intergenic | ARPP21,STAC     | 0.37 | -0.2  | 1.84E-06 | 6.04E-05 |
| rs35806760 | 3  | 36154892 | A | G | intergenic | ARPP21,STAC     | 0.37 | -0.2  | 1.84E-06 | 6.04E-05 |
| rs4274701  | 3  | 36149460 | G | A | intergenic | ARPP21,STAC     | 0.37 | -0.2  | 1.84E-06 | 6.04E-05 |
| rs4678839  | 3  | 36156606 | A | T | intergenic | ARPP21,STAC     | 0.37 | -0.2  | 1.84E-06 | 6.04E-05 |
| rs4678840  | 3  | 36156820 | T | C | intergenic | ARPP21,STAC     | 0.37 | -0.2  | 1.84E-06 | 6.04E-05 |

|             |    |          |   |   |            |             |      |       |          |          |
|-------------|----|----------|---|---|------------|-------------|------|-------|----------|----------|
| rs4678841   | 3  | 36156830 | C | T | intergenic | ARPP21,STAC | 0.37 | -0.2  | 1.84E-06 | 6.04E-05 |
| rs4678842   | 3  | 36156863 | G | A | intergenic | ARPP21,STAC | 0.37 | -0.2  | 1.84E-06 | 6.04E-05 |
| rs4678843   | 3  | 36156936 | T | C | intergenic | ARPP21,STAC | 0.37 | -0.2  | 1.84E-06 | 6.04E-05 |
| rs4678844   | 3  | 36156953 | T | A | intergenic | ARPP21,STAC | 0.37 | -0.2  | 1.84E-06 | 6.04E-05 |
| rs55994095  | 3  | 36143184 | G | A | intergenic | ARPP21,STAC | 0.37 | -0.2  | 1.84E-06 | 6.04E-05 |
| rs60006029  | 3  | 36142927 | A | C | intergenic | ARPP21,STAC | 0.37 | -0.2  | 1.84E-06 | 6.04E-05 |
| rs12492838  | 3  | 36160523 | T | G | intergenic | ARPP21,STAC | 0.37 | -0.2  | 1.98E-06 | 7.13E-05 |
| rs12486141  | 3  | 36172854 | A | G | intergenic | ARPP21,STAC | 0.36 | -0.2  | 2.07E-06 | 6.51E-05 |
| rs11718371  | 3  | 36157193 | G | A | intergenic | ARPP21,STAC | 0.37 | -0.19 | 2.14E-06 | 6.82E-05 |
| rs34033592  | 3  | 36157597 | C | T | intergenic | ARPP21,STAC | 0.37 | -0.19 | 2.14E-06 | 6.82E-05 |
| rs4678520   | 3  | 36158282 | A | G | intergenic | ARPP21,STAC | 0.37 | -0.19 | 2.14E-06 | 6.82E-05 |
| rs4678845   | 3  | 36158113 | T | C | intergenic | ARPP21,STAC | 0.37 | -0.19 | 2.14E-06 | 6.82E-05 |
| rs2382089   | 9  | 9972321  | C | T | intronic   | PTPRD       | 0.28 | -0.21 | 2.15E-06 | 3.62E-04 |
| rs35597811  | 3  | 36170560 | C | A | intergenic | ARPP21,STAC | 0.37 | -0.19 | 2.19E-06 | 8.06E-05 |
| rs9843084   | 3  | 36159165 | G | C | intergenic | ARPP21,STAC | 0.37 | -0.19 | 2.21E-06 | 7.99E-05 |
| rs9869374   | 3  | 36163838 | A | G | intergenic | ARPP21,STAC | 0.38 | -0.19 | 2.23E-06 | 8.46E-05 |
| rs12630703  | 3  | 36162020 | G | A | intergenic | ARPP21,STAC | 0.37 | -0.19 | 2.31E-06 | 7.88E-05 |
| rs7044854   | 9  | 9956016  | G | A | intronic   | PTPRD       | 0.41 | -0.19 | 2.40E-06 | 7.06E-03 |
| rs201215046 | 3  | 36129692 | A | G | intergenic | ARPP21,STAC | 0.35 | -0.2  | 2.41E-06 | 1.19E-04 |
| rs12495220  | 3  | 36165195 | C | T | intergenic | ARPP21,STAC | 0.37 | -0.19 | 2.46E-06 | 8.54E-05 |
| rs4584471   | 10 | 30011336 | T | C | intronic   | SVIL        | 0.31 | 0.2   | 2.50E-06 | 6.63E-03 |
| rs2834655   | 21 | 36238507 | A | G | intronic   | RUNX1       | 0.29 | -0.21 | 2.63E-06 | 1.26E-03 |
| rs10816266  | 9  | 9960778  | A | T | intronic   | PTPRD       | 0.28 | -0.21 | 2.71E-06 | 2.61E-03 |
| rs6532775   | 4  | 77939724 | G | A | intronic   | 11-Sep      | 0.50 | 0.19  | 3.14E-06 | 7.40E-05 |
| rs7612828   | 3  | 36162404 | A | G | intergenic | ARPP21,STAC | 0.37 | -0.19 | 3.18E-06 | 9.92E-05 |
| rs9883761   | 3  | 36171911 | T | C | intergenic | ARPP21,STAC | 0.37 | -0.19 | 3.21E-06 | 9.23E-05 |
| rs9883773   | 3  | 36171933 | G | C | intergenic | ARPP21,STAC | 0.37 | -0.19 | 3.21E-06 | 9.23E-05 |
| rs10222423  | 3  | 36171758 | C | T | intergenic | ARPP21,STAC | 0.37 | -0.19 | 3.29E-06 | 1.09E-04 |
| rs10440106  | 3  | 36171677 | T | G | intergenic | ARPP21,STAC | 0.37 | -0.19 | 3.29E-06 | 1.09E-04 |
| rs12491501  | 3  | 36174614 | T | G | intergenic | ARPP21,STAC | 0.37 | -0.19 | 3.29E-06 | 1.09E-04 |
| rs1375873   | 3  | 36171153 | C | T | intergenic | ARPP21,STAC | 0.37 | -0.19 | 3.29E-06 | 1.09E-04 |
| rs1375874   | 3  | 36171193 | T | C | intergenic | ARPP21,STAC | 0.37 | -0.19 | 3.29E-06 | 1.09E-04 |
| rs1584561   | 3  | 36172488 | G | A | intergenic | ARPP21,STAC | 0.37 | -0.19 | 3.29E-06 | 1.09E-04 |
| rs1584562   | 3  | 36172563 | C | T | intergenic | ARPP21,STAC | 0.37 | -0.19 | 3.29E-06 | 1.09E-04 |
| rs1597412   | 3  | 36176466 | C | T | intergenic | ARPP21,STAC | 0.37 | -0.19 | 3.29E-06 | 1.09E-04 |
| rs1839416   | 3  | 36176579 | T | C | intergenic | ARPP21,STAC | 0.37 | -0.19 | 3.29E-06 | 1.09E-04 |
| rs1839417   | 3  | 36176655 | G | A | intergenic | ARPP21,STAC | 0.37 | -0.19 | 3.29E-06 | 1.09E-04 |
| rs1901021   | 3  | 36168698 | A | C | intergenic | ARPP21,STAC | 0.37 | -0.19 | 3.29E-06 | 1.09E-04 |
| rs2884848   | 3  | 36171119 | A | G | intergenic | ARPP21,STAC | 0.37 | -0.19 | 3.29E-06 | 1.09E-04 |
| rs28858454  | 3  | 36174739 | G | A | intergenic | ARPP21,STAC | 0.37 | -0.19 | 3.29E-06 | 1.09E-04 |
| rs4678521   | 3  | 36173593 | T | C | intergenic | ARPP21,STAC | 0.37 | -0.19 | 3.29E-06 | 1.09E-04 |
| rs6550397   | 3  | 36172921 | A | G | intergenic | ARPP21,STAC | 0.37 | -0.19 | 3.29E-06 | 1.09E-04 |

|            |    |           |   |   |            |                    |      |       |          |          |
|------------|----|-----------|---|---|------------|--------------------|------|-------|----------|----------|
| rs6550400  | 3  | 36177024  | G | T | intergenic | ARPP21,STAC        | 0.37 | -0.19 | 3.29E-06 | 1.09E-04 |
| rs6784507  | 3  | 36172930  | T | C | intergenic | ARPP21,STAC        | 0.37 | -0.19 | 3.29E-06 | 1.09E-04 |
| rs6784587  | 3  | 36172960  | T | C | intergenic | ARPP21,STAC        | 0.37 | -0.19 | 3.29E-06 | 1.09E-04 |
| rs6787068  | 3  | 36178950  | T | G | intergenic | ARPP21,STAC        | 0.37 | -0.19 | 3.29E-06 | 1.09E-04 |
| rs9311126  | 3  | 36170636  | A | G | intergenic | ARPP21,STAC        | 0.37 | -0.19 | 3.29E-06 | 1.09E-04 |
| rs9817686  | 3  | 36169927  | C | T | intergenic | ARPP21,STAC        | 0.37 | -0.19 | 3.29E-06 | 1.09E-04 |
| rs9846222  | 3  | 36172060  | T | A | intergenic | ARPP21,STAC        | 0.37 | -0.19 | 3.29E-06 | 1.09E-04 |
| rs9846682  | 3  | 36172296  | G | A | intergenic | ARPP21,STAC        | 0.37 | -0.19 | 3.29E-06 | 1.09E-04 |
| rs9851057  | 3  | 36176066  | A | G | intergenic | ARPP21,STAC        | 0.37 | -0.19 | 3.29E-06 | 1.09E-04 |
| rs9861270  | 3  | 36177950  | T | C | intergenic | ARPP21,STAC        | 0.37 | -0.19 | 3.29E-06 | 1.09E-04 |
| rs9865483  | 3  | 36175101  | C | T | intergenic | ARPP21,STAC        | 0.37 | -0.19 | 3.29E-06 | 1.09E-04 |
| rs9883792  | 3  | 36171967  | T | C | intergenic | ARPP21,STAC        | 0.37 | -0.19 | 3.29E-06 | 1.09E-04 |
| rs1597413  | 3  | 36176721  | G | C | intergenic | ARPP21,STAC        | 0.37 | -0.19 | 3.40E-06 | 1.05E-04 |
| rs9813550  | 3  | 36163647  | C | T | intergenic | ARPP21,STAC        | 0.37 | -0.19 | 3.46E-06 | 1.07E-04 |
| rs9848822  | 3  | 36160204  | A | G | intergenic | ARPP21,STAC        | 0.37 | -0.19 | 3.46E-06 | 1.07E-04 |
| rs9868610  | 3  | 36163557  | G | C | intergenic | ARPP21,STAC        | 0.37 | -0.19 | 3.46E-06 | 1.07E-04 |
| rs9869042  | 3  | 36163644  | C | G | intergenic | ARPP21,STAC        | 0.37 | -0.19 | 3.46E-06 | 1.07E-04 |
| rs9869686  | 3  | 36164043  | C | G | intergenic | ARPP21,STAC        | 0.37 | -0.19 | 3.47E-06 | 1.08E-04 |
| rs11721250 | 3  | 36162731  | C | T | intergenic | ARPP21,STAC        | 0.37 | -0.19 | 3.48E-06 | 8.83E-05 |
| rs35303461 | 2  | 218830626 | T | C | intergenic | TNS1,CXCR2P1       | 0.10 | -0.32 | 3.57E-06 | 3.42E-05 |
| rs9858239  | 3  | 36161639  | T | C | intergenic | ARPP21,STAC        | 0.37 | -0.19 | 3.62E-06 | 1.05E-04 |
| rs35090855 | 2  | 218830592 | T | C | intergenic | TNS1,CXCR2P1       | 0.10 | -0.32 | 3.67E-06 | 3.24E-05 |
| rs62477365 | 7  | 119105162 | C | T | intergenic | ANKRD7,KCND2       | 0.09 | -0.34 | 3.77E-06 | 8.30E-04 |
| rs34082344 | 3  | 36148812  | G | C | intergenic | ARPP21,STAC        | 0.37 | -0.19 | 3.83E-06 | 8.73E-05 |
| rs34966051 | 3  | 36148815  | G | A | intergenic | ARPP21,STAC        | 0.37 | -0.19 | 3.83E-06 | 8.73E-05 |
| rs7231688  | 18 | 76342080  | A | G | intergenic | LINC01029,SALL3    | 0.22 | 0.22  | 3.93E-06 | 8.26E-03 |
| rs4804181  | 19 | 12509536  | C | A | intronic   | ZNF799             | 0.22 | 0.23  | 4.14E-06 | 1.69E-04 |
| rs6784982  | 3  | 36173158  | C | G | intergenic | ARPP21,STAC        | 0.37 | -0.19 | 4.38E-06 | 1.11E-04 |
| rs9945869  | 18 | 76344891  | A | G | intergenic | LINC01029,SALL3    | 0.22 | 0.22  | 4.50E-06 | 1.02E-02 |
| rs11081627 | 18 | 76338532  | T | C | intergenic | LINC01029,SALL3    | 0.22 | 0.22  | 4.71E-06 | 7.78E-03 |
| rs1936367  | 9  | 9963968   | C | T | intronic   | PTPRD              | 0.28 | -0.2  | 4.88E-06 | 2.64E-03 |
| rs72720951 | 5  | 2532480   | G | A | intergenic | LOC100506858,IRX2  | 0.19 | 0.23  | 4.90E-06 | 2.29E-03 |
| rs4742644  | 9  | 9959413   | C | T | intronic   | PTPRD              | 0.28 | -0.2  | 5.31E-06 | 3.40E-03 |
| rs73060126 | 3  | 36120877  | A | G | intergenic | ARPP21,STAC        | 0.39 | -0.2  | 5.58E-06 | 8.41E-04 |
| rs73050457 | 19 | 39745058  | T | C | intergenic | IFNL4,IFNL2        | 0.10 | -0.32 | 5.60E-06 | 1.47E-04 |
| rs2218907  | 3  | 36112097  | T | C | intergenic | ARPP21,STAC        | 0.48 | 0.18  | 5.79E-06 | 1.46E-06 |
| rs7431028  | 3  | 36110865  | T | G | intergenic | ARPP21,STAC        | 0.48 | 0.18  | 5.87E-06 | 1.48E-06 |
| rs9311127  | 3  | 36170803  | A | C | intergenic | ARPP21,STAC        | 0.36 | -0.19 | 5.97E-06 | 1.99E-04 |
| rs9311128  | 3  | 36170809  | C | T | intergenic | ARPP21,STAC        | 0.36 | -0.19 | 5.97E-06 | 1.99E-04 |
| rs9311129  | 3  | 36170812  | A | G | intergenic | ARPP21,STAC        | 0.36 | -0.19 | 5.97E-06 | 1.99E-04 |
| rs764263   | 6  | 133055612 | C | G | intronic   | VNN3               | 0.55 | 0.18  | 5.98E-06 | 2.57E-04 |
| rs4472062  | 3  | 22423338  | G | C | intergenic | ZNF385D-AS2,UBE2E2 | 0.29 | -0.23 | 5.99E-06 | 2.76E-02 |

|            |    |           |   |   |            |                        |      |       |          |          |
|------------|----|-----------|---|---|------------|------------------------|------|-------|----------|----------|
| rs7138264  | 12 | 8075117   | A | G | intronic   | SLC2A3                 | 0.13 | 0.26  | 6.12E-06 | 1.69E-03 |
| rs11706133 | 3  | 5892059   | G | T | intergenic | MIR4790,LOC101927347   | 0.11 | 0.29  | 6.28E-06 | 5.44E-04 |
| rs13362153 | 5  | 91163650  | G | C | intergenic | ARRDC3-AS1,NR2F1-AS1   | 0.24 | 0.21  | 6.35E-06 | 3.48E-03 |
| rs67085826 | 18 | 76537030  | G | A | intergenic | LINC01029,SALL3        | 0.18 | -0.23 | 6.38E-06 | 7.27E-04 |
| rs6785074  | 3  | 36173266  | T | G | intergenic | ARPP21,STAC            | 0.37 | -0.19 | 6.51E-06 | 1.81E-04 |
| rs6785075  | 3  | 36173267  | T | G | intergenic | ARPP21,STAC            | 0.37 | -0.19 | 6.51E-06 | 1.81E-04 |
| rs1375875  | 3  | 36171547  | T | A | intergenic | ARPP21,STAC            | 0.37 | -0.19 | 6.65E-06 | 1.76E-04 |
| rs36095017 | 18 | 76537186  | G | A | intergenic | LINC01029,SALL3        | 0.18 | -0.23 | 6.77E-06 | 8.07E-04 |
| rs62371708 | 5  | 115069090 | T | C | intergenic | LOC102467217,CDO1      | 0.21 | -0.21 | 6.77E-06 | 2.72E-04 |
| rs68112016 | 18 | 76536915  | G | A | intergenic | LINC01029,SALL3        | 0.18 | -0.23 | 6.81E-06 | 6.76E-04 |
| rs4804669  | 19 | 12502457  | A | G | exonic     | ZNF799                 | 0.21 | 0.23  | 6.93E-06 | 2.62E-04 |
| rs840225   | 13 | 107566858 | T | C | intergenic | LINC00443,FAM155A      | 0.36 | -0.22 | 7.02E-06 | 4.45E-04 |
| rs2373239  | 2  | 218835438 | G | C | intergenic | TNS1,CXCR2P1           | 0.12 | -0.27 | 7.20E-06 | 5.38E-04 |
| rs10978137 | 9  | 9961495   | T | G | intronic   | PTPRD                  | 0.27 | -0.2  | 7.75E-06 | 2.77E-03 |
| rs72956174 | 6  | 102639791 | C | T | intergenic | GRIK2,NONE             | 0.16 | 0.24  | 7.96E-06 | 2.97E-04 |
| rs12882183 | 14 | 87120821  | A | T | intergenic | LOC101928767,LOC283585 | 0.34 | 0.18  | 8.30E-06 | 4.01E-02 |
| rs630693   | 11 | 107197606 | C | G | UTR3       | CWF19L2                | 0.53 | 0.18  | 8.46E-06 | 4.92E-05 |
| rs2473238  | 1  | 22590331  | G | C | intergenic | WNT4,ZBTB40            | 0.55 | 0.17  | 9.10E-06 | 8.79E-04 |
| rs10978138 | 9  | 9964969   | C | T | intronic   | PTPRD                  | 0.34 | -0.18 | 9.60E-06 | 5.13E-03 |
| rs9668489  | 12 | 8075286   | C | T | intronic   | SLC2A3                 | 0.13 | 0.26  | 9.71E-06 | 1.66E-03 |
| rs6907435  | 6  | 102638605 | A | G | intergenic | GRIK2,NONE             | 0.16 | 0.23  | 9.83E-06 | 3.49E-04 |



**Table S3.4.** Top SNPs ( $P < 1E-05$ ) for Longitudinal Change in the Memory Domain

| SNP         | CHR | BP        | A1 | A2 | Region     | GENE                          | MAF<br>Meta | BETA<br>Meta | P-value<br>Meta | P-value<br>Global |
|-------------|-----|-----------|----|----|------------|-------------------------------|-------------|--------------|-----------------|-------------------|
| rs3991621   | 5   | 119409254 | G  | A  | intergenic | FAM170A,PRR16                 | 0.14        | 0.29         | 7.35E-07        | 2.24E-06          |
| rs3991624   | 5   | 119409232 | G  | A  | intergenic | FAM170A,PRR16                 | 0.14        | 0.29         | 7.35E-07        | 2.24E-06          |
| rs3991625   | 5   | 119409253 | T  | C  | intergenic | FAM170A,PRR16                 | 0.14        | 0.29         | 7.35E-07        | 2.24E-06          |
| rs28636751  | 3   | 192211685 | G  | C  | intronic   | FGF12                         | 0.53        | 0.21         | 1.12E-06        | 3.35E-04          |
| rs61310274  | 1   | 179562740 | C  | G  | exonic     | TDRD5                         | 0.34        | -0.2         | 1.54E-06        | 2.94E-04          |
| rs13316167  | 3   | 161656593 | T  | C  | intergenic | OTOL1,LINC01192               | 0.21        | 0.24         | 1.60E-06        | 7.17E-03          |
| rs2897044   | 3   | 161654980 | A  | C  | intergenic | OTOL1,LINC01192               | 0.21        | 0.24         | 1.60E-06        | 7.17E-03          |
| rs2897045   | 3   | 161655316 | C  | T  | intergenic | OTOL1,LINC01192               | 0.21        | 0.24         | 1.60E-06        | 7.17E-03          |
| rs4455332   | 3   | 161655423 | A  | C  | intergenic | OTOL1,LINC01192               | 0.21        | 0.24         | 1.60E-06        | 7.17E-03          |
| rs4501127   | 3   | 161655796 | C  | A  | intergenic | OTOL1,LINC01192               | 0.21        | 0.24         | 1.60E-06        | 7.17E-03          |
| rs6778365   | 3   | 161657384 | A  | C  | intergenic | OTOL1,LINC01192               | 0.21        | 0.24         | 1.60E-06        | 7.17E-03          |
| rs200668351 | 17  | 1062992   | A  | G  | intronic   | ABR                           | 0.22        | 0.34         | 1.65E-06        | 2.65E-04          |
| rs12330372  | 3   | 161658528 | C  | G  | intergenic | OTOL1,LINC01192               | 0.20        | 0.24         | 1.67E-06        | 8.62E-03          |
| rs55635521  | 1   | 179566848 | C  | T  | intronic   | TDRD5                         | 0.34        | -0.2         | 1.67E-06        | 3.06E-04          |
| rs6689426   | 1   | 179569722 | T  | C  | intronic   | TDRD5                         | 0.33        | -0.2         | 1.89E-06        | 4.90E-04          |
| rs60096092  | 1   | 179573130 | A  | T  | intronic   | TDRD5                         | 0.33        | -0.2         | 2.08E-06        | 5.16E-04          |
| rs11581272  | 1   | 179675578 | T  | C  | intergenic | TDRD5,FAM163A                 | 0.33        | -0.2         | 2.58E-06        | 5.45E-04          |
| rs742801    | 1   | 29718865  | G  | C  | intergenic | LOC101928460;<br>LOC101929406 | 0.51        | 0.22         | 3.87E-06        | 2.52E-05          |
| rs377338379 | 1   | 179607282 | T  | C  | intronic   | TDRD5                         | 0.34        | -0.19        | 3.97E-06        | 4.12E-04          |
| rs2295752   | 6   | 6249067   | A  | C  | intronic   | F13A1                         | 0.23        | -0.23        | 4.26E-06        | 3.55E-04          |
| rs488277    | 3   | 182887673 | C  | T  | intergenic | LAMP3,MCF2L2                  | 0.11        | 0.27         | 4.91E-06        | 3.68E-04          |
| rs630527    | 3   | 182887667 | A  | G  | intergenic | LAMP3,MCF2L2                  | 0.11        | 0.27         | 4.91E-06        | 3.68E-04          |
| rs631755    | 3   | 182887921 | A  | C  | intergenic | LAMP3,MCF2L2                  | 0.11        | 0.27         | 5.24E-06        | 4.27E-04          |
| rs12609351  | 19  | 50985038  | T  | C  | intronic   | EMC10                         | 0.20        | -0.22        | 5.32E-06        | 3.49E-05          |
| rs11122508  | 1   | 230542201 | G  | C  | intronic   | PGBD5                         | 0.55        | 0.2          | 5.42E-06        | 1.17E-05          |
| rs4751906   | 10  | 116194780 | G  | C  | UTR3       | ABLIM1                        | 0.53        | 0.18         | 5.47E-06        | 3.30E-04          |
| rs521981    | 3   | 182889001 | C  | T  | intergenic | LAMP3,MCF2L2                  | 0.11        | 0.27         | 6.30E-06        | 4.96E-04          |
| rs831249    | 3   | 182892091 | C  | T  | intergenic | LAMP3,MCF2L2                  | 0.11        | 0.27         | 6.36E-06        | 4.31E-04          |
| rs13243882  | 7   | 28287287  | T  | A  | intergenic | JAZF1-AS1,CREB5               | 0.53        | 0.18         | 6.38E-06        | 3.05E-06          |
| rs34476301  | 3   | 105336788 | A  | G  | intergenic | ALCAM,CBLB                    | 0.08        | 0.37         | 6.50E-06        | 8.43E-05          |
| rs6425580   | 1   | 179592270 | T  | C  | intronic   | TDRD5                         | 0.35        | -0.18        | 6.63E-06        | 6.20E-04          |
| rs13434055  | 3   | 182889449 | C  | T  | intergenic | LAMP3,MCF2L2                  | 0.11        | 0.27         | 6.70E-06        | 5.11E-04          |
| rs1629673   | 3   | 182889310 | G  | A  | intergenic | LAMP3,MCF2L2                  | 0.11        | 0.27         | 6.70E-06        | 5.11E-04          |
| rs544146    | 3   | 182889168 | A  | G  | intergenic | LAMP3,MCF2L2                  | 0.11        | 0.27         | 6.70E-06        | 5.11E-04          |
| rs6443858   | 3   | 182891718 | C  | G  | intergenic | LAMP3,MCF2L2                  | 0.11        | 0.27         | 6.70E-06        | 5.11E-04          |
| rs831246    | 3   | 182891880 | T  | C  | intergenic | LAMP3,MCF2L2                  | 0.11        | 0.27         | 6.70E-06        | 5.11E-04          |
| rs831247    | 3   | 182891900 | G  | C  | intergenic | LAMP3,MCF2L2                  | 0.11        | 0.27         | 6.70E-06        | 5.11E-04          |
| rs55852023  | 3   | 182892163 | C  | T  | intergenic | LAMP3,MCF2L2                  | 0.11        | 0.27         | 6.95E-06        | 5.21E-04          |
| rs3818682   | 6   | 89915684  | T  | C  | intronic   | GABRR1                        | 0.38        | -0.18        | 6.98E-06        | 2.64E-04          |

|            |    |           |   |   |            |               |      |       |          |          |
|------------|----|-----------|---|---|------------|---------------|------|-------|----------|----------|
| rs429358   | 19 | 45411941  | C | T | exonic     | APOE          | 0.10 | -0.29 | 7.18E-06 | 1.03E-05 |
| rs56376309 | 1  | 179622996 | G | A | intronic   | TDRD5         | 0.35 | -0.18 | 7.22E-06 | 6.48E-04 |
| rs7547988  | 1  | 179629123 | A | G | intronic   | TDRD5         | 0.35 | -0.18 | 7.22E-06 | 6.48E-04 |
| rs12045588 | 1  | 179630536 | T | C | intronic   | TDRD5         | 0.35 | -0.18 | 7.23E-06 | 6.88E-04 |
| rs4420638  | 19 | 45422946  | G | A | downstream | APOC1         | 0.15 | -0.24 | 8.05E-06 | 5.15E-05 |
| rs10157829 | 1  | 179586314 | G | A | intronic   | TDRD5         | 0.35 | -0.18 | 8.47E-06 | 8.40E-04 |
| rs6072411  | 20 | 40168384  | G | A | intronic   | CHD6          | 0.19 | 0.22  | 8.48E-06 | 1.90E-05 |
| rs12161428 | 1  | 179615732 | T | C | intronic   | TDRD5         | 0.35 | -0.18 | 8.65E-06 | 8.52E-04 |
| rs3818683  | 6  | 89915678  | C | T | intronic   | GABRR1        | 0.38 | -0.18 | 8.73E-06 | 3.63E-04 |
| rs34654927 | 3  | 105336694 | A | C | intergenic | ALCAM,CBLB    | 0.08 | 0.37  | 8.84E-06 | 1.01E-04 |
| rs10913848 | 1  | 179615695 | C | G | intronic   | TDRD5         | 0.35 | -0.18 | 8.97E-06 | 7.70E-04 |
| rs6656590  | 1  | 214751786 | T | C | intergenic | PTPN14,CENPF  | 0.31 | 0.19  | 9.17E-06 | 1.02E-04 |
| rs36185880 | 1  | 179616218 | G | A | intronic   | TDRD5         | 0.35 | -0.18 | 9.33E-06 | 8.60E-04 |
| rs6901256  | 6  | 37080126  | A | G | intergenic | FGD2,PIM1     | 0.34 | -0.19 | 9.50E-06 | 1.28E-05 |
| rs10913846 | 1  | 179613777 | A | G | intronic   | TDRD5         | 0.35 | -0.18 | 9.55E-06 | 6.81E-04 |
| rs62363118 | 5  | 85046197  | G | T | intergenic | EDIL3,NBPF22P | 0.30 | 0.19  | 9.56E-06 | 4.23E-03 |

**Table S3.5. Top SNPs ( $P < 1E-05$ ) for Longitudinal Change in the Visuospatial Ability Domain**

| SNP         | CHR | BP        | A1 | A2 | Region             | GENE                | MAF<br>Meta | BETA<br>Meta | P-value<br>Meta | P-value<br>Global |
|-------------|-----|-----------|----|----|--------------------|---------------------|-------------|--------------|-----------------|-------------------|
| rs57169846  | 7   | 53655073  | A  | G  | intergenic         | POM121L12,LINC01446 | 0.27        | 0.22         | 2.77E-06        | 1.11E-01          |
| rs12668067  | 7   | 53656073  | G  | A  | intergenic         | POM121L12,LINC01446 | 0.27        | 0.22         | 2.90E-06        | 1.09E-01          |
| rs77993098  | 2   | 35063984  | T  | A  | intergenic         | MYADML,LOC100288911 | 0.20        | -0.24        | 3.56E-06        | 9.26E-01          |
| rs2075199   | 16  | 51538763  | T  | C  | intergenic         | SALL1,LOC101927364  | 0.20        | -0.26        | 4.28E-06        | 7.13E-01          |
| rs13405485  | 2   | 34978311  | A  | G  | intergenic         | MYADML,LOC100288911 | 0.29        | -0.21        | 4.36E-06        | 8.48E-01          |
| rs60878796  | 2   | 35054007  | A  | T  | intergenic         | MYADML,LOC100288911 | 0.20        | -0.24        | 4.80E-06        | 9.20E-01          |
| rs60686175  | 1   | 209756812 | C  | T  | upstream           | CAMK1G              | 0.22        | 0.22         | 5.51E-06        | 2.51E-02          |
| rs10194489  | 2   | 35056794  | T  | C  | intergenic         | MYADML,LOC100288911 | 0.20        | -0.23        | 6.20E-06        | 8.28E-01          |
| rs55715896  | 7   | 53647536  | C  | T  | intergenic         | POM121L12,LINC01446 | 0.27        | 0.21         | 6.46E-06        | 1.09E-01          |
| rs6957101   | 7   | 53646156  | C  | T  | intergenic         | POM121L12,LINC01446 | 0.27        | 0.21         | 6.46E-06        | 1.09E-01          |
| rs12084657  | 1   | 209751795 | C  | G  | intergenic         | MIR205HG,CAMK1G     | 0.22        | 0.22         | 7.14E-06        | 2.63E-02          |
| rs7512091   | 1   | 209753248 | A  | T  | intergenic         | MIR205HG,CAMK1G     | 0.22        | 0.22         | 7.14E-06        | 2.63E-02          |
| rs140810004 | 7   | 153748948 | T  | C  | intronic           | DPP6                | 0.39        | -0.23        | 7.20E-06        | 4.43E-01          |
| rs61869228  | 10  | 126901057 | T  | C  | intergenic         | CTBP2,TEX36-AS1     | 0.09        | 0.31         | 8.11E-06        | 3.60E-01          |
| rs145866284 | 16  | 51512759  | C  | T  | intergenic         | SALL1,LOC101927364  | 0.19        | -0.24        | 8.39E-06        | 7.77E-01          |
| rs13338826  | 16  | 51497459  | G  | C  | intergenic         | SALL1,LOC101927364  | 0.19        | -0.25        | 8.53E-06        | 4.39E-01          |
| rs10169121  | 2   | 35068284  | A  | C  | intergenic         | MYADML,LOC100288911 | 0.20        | -0.23        | 8.67E-06        | 8.13E-01          |
| rs6593447   | 10  | 45400235  | G  | A  | ncRNA;<br>intronic | TMEM72-AS1          | 0.39        | -0.18        | 8.76E-06        | 3.34E-02          |
| rs76927693  | 2   | 35037178  | C  | A  | intergenic         | MYADML,LOC100288911 | 0.28        | -0.21        | 9.29E-06        | 8.22E-01          |
| rs17014822  | 1   | 209756470 | G  | A  | upstream           | CAMK1G              | 0.21        | 0.22         | 9.54E-06        | 1.36E-02          |
| rs58987909  | 1   | 209735238 | G  | C  | intergenic         | MIR205HG,CAMK1G     | 0.21        | 0.22         | 9.65E-06        | 1.61E-02          |
| rs61822168  | 1   | 209735726 | G  | A  | intergenic         | MIR205HG,CAMK1G     | 0.21        | 0.22         | 9.65E-06        | 1.61E-02          |
| rs10169451  | 2   | 35038515  | T  | C  | intergenic         | MYADML,LOC100288911 | 0.27        | -0.21        | 9.85E-06        | 8.90E-01          |

**Table S4.** *P*-values of the Top SNP (hg37-Chr13:52335201:rs9535753) for Longitudinal Changes in in all Domains

| Studies                       | Meta   |                 | MyHAT   |                 | MoVIES |                 |
|-------------------------------|--------|-----------------|---------|-----------------|--------|-----------------|
| <i>Minor Allele Frequency</i> | 17.15% |                 | 18.11%  |                 | 15.21% |                 |
| Domains                       | Beta   | <i>P</i> -value | Beta    | <i>P</i> -value | Beta   | <i>P</i> -value |
| Attention/processing speed    | 0.2818 | 3.37e-08        | 0.2064  | 7.57e-04        | 0.4881 | 1.47e-06        |
| Executive function            | 0.2220 | 1.94e-05        | 0.1969  | 1.31e-03        | 0.2920 | 4.31e-03        |
| Language                      | 0.1277 | 1.38e-02        | 0.1135  | 6.28e-02        | 0.1681 | 1.03e-01        |
| Memory                        | 0.0769 | 1.51e-01        | 0.0854  | 1.65e-01        | 0.0534 | 6.03e-01        |
| Visuospatial ability          | 0.0003 | 9.89e-01        | -0.0036 | 9.55e-01        | 0.0104 | 9.20e-01        |
| Global cognition              | 0.1847 | 4.04e-04        | 0.1602  | 9.64e-03        | 0.2514 | 1.37e-02        |

**Table S5.** Expression Quantitative Traits Loci (eQTL) Results for the *WDFY2* Genome-wide Significant SNPs for Attention/processing speed in the Brain and Blood

| SNP        | BP       | LD   | META_P   | eQTL_GENE    | eQTL beta | eQTL <i>P</i> -value | Tissue                         |
|------------|----------|------|----------|--------------|-----------|----------------------|--------------------------------|
| rs17532412 | 52308103 | 1.00 | 3.37E-08 | WDFY2        | 0.20      | 4.41E-05             | Whole_Blood                    |
| rs17532412 | 52308103 | 1.00 | 3.37E-08 | WDFY2        | 0.34      | 1.07E-04             | Brain_Cerebellar_Hemisphere    |
| rs17532412 | 52308103 | 1.00 | 3.37E-08 | WDFY2        | 0.35      | 6.92E-04             | Brain_Cerebellum               |
| rs17532412 | 52308103 | 1.00 | 3.37E-08 | CKAP2        | -0.35     | 2.16E-03             | Brain_Cortex                   |
| rs17532412 | 52308103 | 1.00 | 3.37E-08 | WDFY2        | 0.30      | 2.18E-03             | Brain_Hippocampus              |
| rs17532412 | 52308103 | 1.00 | 3.37E-08 | ATP7B        | -0.41     | 2.73E-03             | Brain_Cerebellum               |
| rs17532412 | 52308103 | 1.00 | 3.37E-08 | ATP7B        | -0.41     | 5.60E-03             | Brain_Spinal_cord_cervical_c-1 |
| rs17532412 | 52308103 | 1.00 | 3.37E-08 | CTAGE3P      | -0.43     | 8.75E-03             | Brain_Putamen_basal_ganglia    |
| rs17532412 | 52308103 | 1.00 | 3.37E-08 | WDFY2        | 0.27      | 1.15E-02             | Brain_Hypothalamus             |
| rs17532412 | 52308103 | 1.00 | 3.37E-08 | HNRNPA1L2    | 0.15      | 1.33E-02             | Whole_Blood                    |
| rs17532412 | 52308103 | 1.00 | 3.37E-08 | CTAGE3P      | -0.55     | 1.42E-02             | Brain_Spinal_cord_cervical_c-1 |
| rs17532412 | 52308103 | 1.00 | 3.37E-08 | RP11-24B19.3 | 0.44      | 1.57E-02             | Brain_Amygdala                 |
| rs17532412 | 52308103 | 1.00 | 3.37E-08 | INTS6        | -0.42     | 1.65E-02             | Brain_Hippocampus              |
| rs17532412 | 52308103 | 1.00 | 3.37E-08 | DHRS12       | -0.26     | 1.68E-02             | Brain_Hypothalamus             |
| rs17532412 | 52308103 | 1.00 | 3.37E-08 | ALG11        | -0.27     | 1.68E-02             | Brain_Spinal_cord_cervical_c-1 |
| rs17532412 | 52308103 | 1.00 | 3.37E-08 | DHRS12       | -0.21     | 1.76E-02             | Brain_Cerebellar_Hemisphere    |
| rs17532412 | 52308103 | 1.00 | 3.37E-08 | WDFY2        | 0.17      | 2.29E-02             | Brain_Cortex                   |
| rs17532412 | 52308103 | 1.00 | 3.37E-08 | UTP14C       | 0.20      | 2.56E-02             | Brain_Cortex                   |
| rs17532412 | 52308103 | 1.00 | 3.37E-08 | NEK5         | -0.22     | 2.66E-02             | Brain_Caudate_basal_ganglia    |
| rs17532412 | 52308103 | 1.00 | 3.37E-08 | INTS6        | -0.40     | 3.09E-02             | Brain_Substantia_nigra         |

|            |          |      |          |              |       |          |                                       |
|------------|----------|------|----------|--------------|-------|----------|---------------------------------------|
| rs17532412 | 52308103 | 1.00 | 3.37E-08 | UTP14C       | 0.24  | 3.12E-02 | Brain_Amygdala                        |
| rs17532412 | 52308103 | 1.00 | 3.37E-08 | MRPS31P5     | -0.17 | 3.17E-02 | Brain_Caudate_basal_ganglia           |
| rs17532412 | 52308103 | 1.00 | 3.37E-08 | THSD1        | 0.28  | 3.29E-02 | Brain_Hippocampus                     |
| rs17532412 | 52308103 | 1.00 | 3.37E-08 | ALG11        | -0.18 | 3.91E-02 | Brain_Nucleus_accumbens_basal_ganglia |
| rs17532412 | 52308103 | 1.00 | 3.37E-08 | NEK5         | -0.38 | 4.16E-02 | Brain_Spinal_cord_cervical_c-1        |
| rs17532412 | 52308103 | 1.00 | 3.37E-08 | INTS6        | -0.32 | 4.19E-02 | Brain_Hypothalamus                    |
| rs17532412 | 52308103 | 1.00 | 3.37E-08 | WDFY2        | 0.31  | 4.32E-02 | Brain_Spinal_cord_cervical_c-1        |
| rs17532412 | 52308103 | 1.00 | 3.37E-08 | CKAP2        | -0.24 | 4.66E-02 | Brain_Cerebellar_Hemisphere           |
| rs9535743  | 52309076 | 1.00 | 4.78E-08 | WDFY2        | 0.22  | 8.95E-06 | Whole_Blood                           |
| rs9535743  | 52309076 | 1.00 | 4.78E-08 | WDFY2        | 0.34  | 1.41E-04 | Brain_Cerebellar_Hemisphere           |
| rs9535743  | 52309076 | 1.00 | 4.78E-08 | WDFY2        | 0.32  | 1.78E-03 | Brain_Cerebellum                      |
| rs9535743  | 52309076 | 1.00 | 4.78E-08 | WDFY2        | 0.30  | 2.18E-03 | Brain_Hippocampus                     |
| rs9535743  | 52309076 | 1.00 | 4.78E-08 | CKAP2        | -0.34 | 2.29E-03 | Brain_Cortex                          |
| rs9535743  | 52309076 | 1.00 | 4.78E-08 | ATP7B        | -0.39 | 4.01E-03 | Brain_Cerebellum                      |
| rs9535743  | 52309076 | 1.00 | 4.78E-08 | CTAGE3P      | -0.58 | 8.49E-03 | Brain_Spinal_cord_cervical_c-1        |
| rs9535743  | 52309076 | 1.00 | 4.78E-08 | CTAGE3P      | -0.43 | 8.75E-03 | Brain_Putamen_basal_ganglia           |
| rs9535743  | 52309076 | 1.00 | 4.78E-08 | ATP7B        | -0.39 | 9.87E-03 | Brain_Spinal_cord_cervical_c-1        |
| rs9535743  | 52309076 | 1.00 | 4.78E-08 | WDFY2        | 0.27  | 1.15E-02 | Brain_Hypothalamus                    |
| rs9535743  | 52309076 | 1.00 | 4.78E-08 | WDFY2        | 0.37  | 1.43E-02 | Brain_Spinal_cord_cervical_c-1        |
| rs9535743  | 52309076 | 1.00 | 4.78E-08 | WDFY2        | 0.18  | 1.46E-02 | Brain_Cortex                          |
| rs9535743  | 52309076 | 1.00 | 4.78E-08 | RP11-24B19.3 | 0.44  | 1.57E-02 | Brain_Amygdala                        |
| rs9535743  | 52309076 | 1.00 | 4.78E-08 | INTS6        | -0.42 | 1.65E-02 | Brain_Hippocampus                     |
| rs9535743  | 52309076 | 1.00 | 4.78E-08 | DHRS12       | -0.26 | 1.68E-02 | Brain_Hypothalamus                    |
| rs9535743  | 52309076 | 1.00 | 4.78E-08 | NEK5         | -0.22 | 2.66E-02 | Brain_Caudate_basal_ganglia           |
| rs9535743  | 52309076 | 1.00 | 4.78E-08 | DHRS12       | -0.20 | 2.92E-02 | Brain_Cerebellar_Hemisphere           |
| rs9535743  | 52309076 | 1.00 | 4.78E-08 | ALG11        | -0.25 | 2.98E-02 | Brain_Spinal_cord_cervical_c-1        |
| rs9535743  | 52309076 | 1.00 | 4.78E-08 | INTS6        | -0.40 | 3.09E-02 | Brain_Substantia_nigra                |
| rs9535743  | 52309076 | 1.00 | 4.78E-08 | UTP14C       | 0.24  | 3.12E-02 | Brain_Amygdala                        |
| rs9535743  | 52309076 | 1.00 | 4.78E-08 | MRPS31P5     | -0.17 | 3.17E-02 | Brain_Caudate_basal_ganglia           |
| rs9535743  | 52309076 | 1.00 | 4.78E-08 | THSD1        | 0.28  | 3.29E-02 | Brain_Hippocampus                     |
| rs9535743  | 52309076 | 1.00 | 4.78E-08 | HNRNPA1L2    | 0.13  | 3.38E-02 | Whole_Blood                           |
| rs9535743  | 52309076 | 1.00 | 4.78E-08 | ALG11        | -0.18 | 3.91E-02 | Brain_Nucleus_accumbens_basal_ganglia |
| rs9535743  | 52309076 | 1.00 | 4.78E-08 | CKAP2        | -0.25 | 3.92E-02 | Brain_Cerebellar_Hemisphere           |
| rs9535743  | 52309076 | 1.00 | 4.78E-08 | INTS6        | -0.32 | 4.19E-02 | Brain_Hypothalamus                    |
| rs9535743  | 52309076 | 1.00 | 4.78E-08 | UTP14C       | 0.18  | 4.19E-02 | Brain_Cortex                          |
| rs9535743  | 52309076 | 1.00 | 4.78E-08 | NEK5         | -0.37 | 4.67E-02 | Brain_Spinal_cord_cervical_c-1        |
| rs9535744  | 52311481 | 1.00 | 3.37E-08 | WDFY2        | 0.20  | 4.58E-05 | Whole_Blood                           |
| rs9535744  | 52311481 | 1.00 | 3.37E-08 | WDFY2        | 0.34  | 1.07E-04 | Brain_Cerebellar_Hemisphere           |
| rs9535744  | 52311481 | 1.00 | 3.37E-08 | WDFY2        | 0.37  | 4.92E-04 | Brain_Cerebellum                      |
| rs9535744  | 52311481 | 1.00 | 3.37E-08 | WDFY2        | 0.30  | 2.18E-03 | Brain_Hippocampus                     |
| rs9535744  | 52311481 | 1.00 | 3.37E-08 | CKAP2        | -0.33 | 3.97E-03 | Brain_Cortex                          |

|           |          |      |          |              |       |          |                                       |
|-----------|----------|------|----------|--------------|-------|----------|---------------------------------------|
| rs9535744 | 52311481 | 1.00 | 3.37E-08 | ATP7B        | -0.41 | 7.82E-03 | Brain_Spinal_cord_cervical_c-1        |
| rs9535744 | 52311481 | 1.00 | 3.37E-08 | ATP7B        | -0.37 | 8.16E-03 | Brain_Cerebellum                      |
| rs9535744 | 52311481 | 1.00 | 3.37E-08 | CTAGE3P      | -0.43 | 9.29E-03 | Brain_Putamen_basal_ganglia           |
| rs9535744 | 52311481 | 1.00 | 3.37E-08 | WDFY2        | 0.27  | 1.15E-02 | Brain_Hypothalamus                    |
| rs9535744 | 52311481 | 1.00 | 3.37E-08 | HNRNPA1L2    | 0.15  | 1.51E-02 | Whole_Blood                           |
| rs9535744 | 52311481 | 1.00 | 3.37E-08 | ALG11        | -0.28 | 1.56E-02 | Brain_Spinal_cord_cervical_c-1        |
| rs9535744 | 52311481 | 1.00 | 3.37E-08 | RP11-24B19.3 | 0.44  | 1.57E-02 | Brain_Amygdala                        |
| rs9535744 | 52311481 | 1.00 | 3.37E-08 | UTP14C       | 0.22  | 1.61E-02 | Brain_Cortex                          |
| rs9535744 | 52311481 | 1.00 | 3.37E-08 | INTS6        | -0.42 | 1.65E-02 | Brain_Hippocampus                     |
| rs9535744 | 52311481 | 1.00 | 3.37E-08 | DHRS12       | -0.26 | 1.68E-02 | Brain_Hypothalamus                    |
| rs9535744 | 52311481 | 1.00 | 3.37E-08 | CTAGE3P      | -0.55 | 1.69E-02 | Brain_Spinal_cord_cervical_c-1        |
| rs9535744 | 52311481 | 1.00 | 3.37E-08 | DHRS12       | -0.21 | 1.76E-02 | Brain_Cerebellar_Hemisphere           |
| rs9535744 | 52311481 | 1.00 | 3.37E-08 | NEK5         | -0.22 | 2.91E-02 | Brain_Caudate_basal_ganglia           |
| rs9535744 | 52311481 | 1.00 | 3.37E-08 | UTP14C       | 0.24  | 3.12E-02 | Brain_Amygdala                        |
| rs9535744 | 52311481 | 1.00 | 3.37E-08 | INTS6        | -0.40 | 3.20E-02 | Brain_Substantia_nigra                |
| rs9535744 | 52311481 | 1.00 | 3.37E-08 | MRPS31P5     | -0.17 | 3.27E-02 | Brain_Caudate_basal_ganglia           |
| rs9535744 | 52311481 | 1.00 | 3.37E-08 | THSD1        | 0.28  | 3.29E-02 | Brain_Hippocampus                     |
| rs9535744 | 52311481 | 1.00 | 3.37E-08 | ALG11        | -0.19 | 3.50E-02 | Brain_Nucleus_accumbens_basal_ganglia |
| rs9535744 | 52311481 | 1.00 | 3.37E-08 | NEK5         | -0.40 | 3.76E-02 | Brain_Spinal_cord_cervical_c-1        |
| rs9535744 | 52311481 | 1.00 | 3.37E-08 | WDFY2        | 0.16  | 4.11E-02 | Brain_Cortex                          |
| rs9535744 | 52311481 | 1.00 | 3.37E-08 | INTS6        | -0.32 | 4.19E-02 | Brain_Hypothalamus                    |
| rs9535744 | 52311481 | 1.00 | 3.37E-08 | INTS6-AS1    | 0.21  | 4.57E-02 | Brain_Cerebellum                      |
| rs9535744 | 52311481 | 1.00 | 3.37E-08 | CKAP2        | -0.24 | 4.66E-02 | Brain_Cerebellar_Hemisphere           |
| rs9535745 | 52312297 | 0.99 | 4.78E-08 | WDFY2        | 0.22  | 1.27E-05 | Whole_Blood                           |
| rs9535745 | 52312297 | 0.99 | 4.78E-08 | WDFY2        | 0.34  | 1.41E-04 | Brain_Cerebellar_Hemisphere           |
| rs9535745 | 52312297 | 0.99 | 4.78E-08 | WDFY2        | 0.35  | 8.27E-04 | Brain_Cerebellum                      |
| rs9535745 | 52312297 | 0.99 | 4.78E-08 | WDFY2        | 0.30  | 2.18E-03 | Brain_Hippocampus                     |
| rs9535745 | 52312297 | 0.99 | 4.78E-08 | CKAP2        | -0.34 | 2.67E-03 | Brain_Cortex                          |
| rs9535745 | 52312297 | 0.99 | 4.78E-08 | ATP7B        | -0.41 | 3.26E-03 | Brain_Cerebellum                      |
| rs9535745 | 52312297 | 0.99 | 4.78E-08 | CTAGE3P      | -0.58 | 8.49E-03 | Brain_Spinal_cord_cervical_c-1        |
| rs9535745 | 52312297 | 0.99 | 4.78E-08 | CTAGE3P      | -0.43 | 8.75E-03 | Brain_Putamen_basal_ganglia           |
| rs9535745 | 52312297 | 0.99 | 4.78E-08 | ATP7B        | -0.39 | 9.87E-03 | Brain_Spinal_cord_cervical_c-1        |
| rs9535745 | 52312297 | 0.99 | 4.78E-08 | WDFY2        | 0.27  | 1.15E-02 | Brain_Hypothalamus                    |
| rs9535745 | 52312297 | 0.99 | 4.78E-08 | WDFY2        | 0.37  | 1.43E-02 | Brain_Spinal_cord_cervical_c-1        |
| rs9535745 | 52312297 | 0.99 | 4.78E-08 | RP11-24B19.3 | 0.44  | 1.57E-02 | Brain_Amygdala                        |
| rs9535745 | 52312297 | 0.99 | 4.78E-08 | INTS6        | -0.42 | 1.65E-02 | Brain_Hippocampus                     |
| rs9535745 | 52312297 | 0.99 | 4.78E-08 | DHRS12       | -0.26 | 1.68E-02 | Brain_Hypothalamus                    |
| rs9535745 | 52312297 | 0.99 | 4.78E-08 | WDFY2        | 0.17  | 2.28E-02 | Brain_Cortex                          |
| rs9535745 | 52312297 | 0.99 | 4.78E-08 | UTP14C       | 0.20  | 2.36E-02 | Brain_Cortex                          |
| rs9535745 | 52312297 | 0.99 | 4.78E-08 | HNRNPA1L2    | 0.14  | 2.62E-02 | Whole_Blood                           |
| rs9535745 | 52312297 | 0.99 | 4.78E-08 | NEK5         | -0.22 | 2.66E-02 | Brain_Caudate_basal_ganglia           |

|            |          |      |          |              |       |          |                                       |
|------------|----------|------|----------|--------------|-------|----------|---------------------------------------|
| rs9535745  | 52312297 | 0.99 | 4.78E-08 | DHRS12       | -0.20 | 2.92E-02 | Brain_Cerebellar_Hemisphere           |
| rs9535745  | 52312297 | 0.99 | 4.78E-08 | ALG11        | -0.25 | 2.98E-02 | Brain_Spinal_cord_cervical_c-1        |
| rs9535745  | 52312297 | 0.99 | 4.78E-08 | INTS6        | -0.40 | 3.09E-02 | Brain_Substantia_nigra                |
| rs9535745  | 52312297 | 0.99 | 4.78E-08 | UTP14C       | 0.24  | 3.12E-02 | Brain_Amygdala                        |
| rs9535745  | 52312297 | 0.99 | 4.78E-08 | MRPS31P5     | -0.17 | 3.17E-02 | Brain_Caudate_basal_ganglia           |
| rs9535745  | 52312297 | 0.99 | 4.78E-08 | THSD1        | 0.28  | 3.29E-02 | Brain_Hippocampus                     |
| rs9535745  | 52312297 | 0.99 | 4.78E-08 | ALG11        | -0.18 | 3.91E-02 | Brain_Nucleus_accumbens_basal_ganglia |
| rs9535745  | 52312297 | 0.99 | 4.78E-08 | CKAP2        | -0.25 | 3.92E-02 | Brain_Cerebellar_Hemisphere           |
| rs9535745  | 52312297 | 0.99 | 4.78E-08 | INTS6        | -0.32 | 4.19E-02 | Brain_Hypothalamus                    |
| rs9535745  | 52312297 | 0.99 | 4.78E-08 | NEK5         | -0.37 | 4.67E-02 | Brain_Spinal_cord_cervical_c-1        |
| rs17532524 | 52316599 | 0.99 | 4.78E-08 | WDFY2        | 0.22  | 9.96E-06 | Whole_Blood                           |
| rs17532524 | 52316599 | 0.99 | 4.78E-08 | WDFY2        | 0.33  | 1.93E-04 | Brain_Cerebellar_Hemisphere           |
| rs17532524 | 52316599 | 0.99 | 4.78E-08 | WDFY2        | 0.34  | 1.26E-03 | Brain_Cerebellum                      |
| rs17532524 | 52316599 | 0.99 | 4.78E-08 | WDFY2        | 0.30  | 1.84E-03 | Brain_Hippocampus                     |
| rs17532524 | 52316599 | 0.99 | 4.78E-08 | ATP7B        | -0.42 | 2.47E-03 | Brain_Cerebellum                      |
| rs17532524 | 52316599 | 0.99 | 4.78E-08 | CKAP2        | -0.34 | 2.81E-03 | Brain_Cortex                          |
| rs17532524 | 52316599 | 0.99 | 4.78E-08 | ATP7B        | -0.45 | 2.95E-03 | Brain_Spinal_cord_cervical_c-1        |
| rs17532524 | 52316599 | 0.99 | 4.78E-08 | CTAGE3P      | -0.45 | 6.25E-03 | Brain_Putamen_basal_ganglia           |
| rs17532524 | 52316599 | 0.99 | 4.78E-08 | CTAGE3P      | -0.61 | 7.60E-03 | Brain_Spinal_cord_cervical_c-1        |
| rs17532524 | 52316599 | 0.99 | 4.78E-08 | WDFY2        | 0.27  | 1.30E-02 | Brain_Hypothalamus                    |
| rs17532524 | 52316599 | 0.99 | 4.78E-08 | RP11-24B19.3 | 0.45  | 1.35E-02 | Brain_Amygdala                        |
| rs17532524 | 52316599 | 0.99 | 4.78E-08 | WDFY2        | 0.37  | 1.46E-02 | Brain_Spinal_cord_cervical_c-1        |
| rs17532524 | 52316599 | 0.99 | 4.78E-08 | DHRS12       | -0.26 | 1.66E-02 | Brain_Hypothalamus                    |
| rs17532524 | 52316599 | 0.99 | 4.78E-08 | UTP14C       | 0.21  | 1.77E-02 | Brain_Cortex                          |
| rs17532524 | 52316599 | 0.99 | 4.78E-08 | INTS6        | -0.41 | 1.91E-02 | Brain_Hippocampus                     |
| rs17532524 | 52316599 | 0.99 | 4.78E-08 | UTP14C       | 0.25  | 2.82E-02 | Brain_Amygdala                        |
| rs17532524 | 52316599 | 0.99 | 4.78E-08 | NEK5         | -0.41 | 3.20E-02 | Brain_Spinal_cord_cervical_c-1        |
| rs17532524 | 52316599 | 0.99 | 4.78E-08 | DHRS12       | -0.19 | 3.21E-02 | Brain_Cerebellar_Hemisphere           |
| rs17532524 | 52316599 | 0.99 | 4.78E-08 | NEK5         | -0.22 | 3.22E-02 | Brain_Caudate_basal_ganglia           |
| rs17532524 | 52316599 | 0.99 | 4.78E-08 | WDFY2        | 0.16  | 3.26E-02 | Brain_Cortex                          |
| rs17532524 | 52316599 | 0.99 | 4.78E-08 | ALG11        | -0.25 | 3.35E-02 | Brain_Spinal_cord_cervical_c-1        |
| rs17532524 | 52316599 | 0.99 | 4.78E-08 | HNRNPA1L2    | 0.13  | 3.42E-02 | Whole_Blood                           |
| rs17532524 | 52316599 | 0.99 | 4.78E-08 | RP11-24B19.4 | 0.38  | 3.92E-02 | Brain_Hypothalamus                    |
| rs17532524 | 52316599 | 0.99 | 4.78E-08 | MRPS31P5     | -0.16 | 3.97E-02 | Brain_Caudate_basal_ganglia           |
| rs17532524 | 52316599 | 0.99 | 4.78E-08 | THSD1        | 0.27  | 4.09E-02 | Brain_Hippocampus                     |
| rs17532524 | 52316599 | 0.99 | 4.78E-08 | INTS6        | -0.38 | 4.14E-02 | Brain_Substantia_nigra                |
| rs17532524 | 52316599 | 0.99 | 4.78E-08 | INTS6        | -0.32 | 4.24E-02 | Brain_Hypothalamus                    |
| rs17532524 | 52316599 | 0.99 | 4.78E-08 | SERPINE3     | 0.37  | 4.34E-02 | Brain_Cortex                          |
| rs17532524 | 52316599 | 0.99 | 4.78E-08 | ATP7B        | -0.31 | 4.36E-02 | Brain_Putamen_basal_ganglia           |
| rs17532524 | 52316599 | 0.99 | 4.78E-08 | CKAP2        | -0.24 | 4.47E-02 | Brain_Cerebellar_Hemisphere           |
| rs17532524 | 52316599 | 0.99 | 4.78E-08 | INTS6        | -0.28 | 4.49E-02 | Brain_Putamen_basal_ganglia           |

|            |          |      |          |              |       |          |                                       |
|------------|----------|------|----------|--------------|-------|----------|---------------------------------------|
| rs17532524 | 52316599 | 0.99 | 4.78E-08 | ALG11        | -0.17 | 4.91E-02 | Brain_Nucleus_accumbens_basal_ganglia |
| rs9535747  | 52322184 | 0.99 | 4.78E-08 | WDFY2        | 0.22  | 1.27E-05 | Whole_Blood                           |
| rs9535747  | 52322184 | 0.99 | 4.78E-08 | WDFY2        | 0.34  | 1.41E-04 | Brain_Cerebellar_Hemisphere           |
| rs9535747  | 52322184 | 0.99 | 4.78E-08 | WDFY2        | 0.35  | 8.27E-04 | Brain_Cerebellum                      |
| rs9535747  | 52322184 | 0.99 | 4.78E-08 | WDFY2        | 0.30  | 2.18E-03 | Brain_Hippocampus                     |
| rs9535747  | 52322184 | 0.99 | 4.78E-08 | CKAP2        | -0.34 | 2.67E-03 | Brain_Cortex                          |
| rs9535747  | 52322184 | 0.99 | 4.78E-08 | ATP7B        | -0.41 | 3.26E-03 | Brain_Cerebellum                      |
| rs9535747  | 52322184 | 0.99 | 4.78E-08 | CTAGE3P      | -0.58 | 8.49E-03 | Brain_Spinal_cord_cervical_c-1        |
| rs9535747  | 52322184 | 0.99 | 4.78E-08 | CTAGE3P      | -0.43 | 8.75E-03 | Brain_Putamen_basal_ganglia           |
| rs9535747  | 52322184 | 0.99 | 4.78E-08 | ATP7B        | -0.39 | 9.87E-03 | Brain_Spinal_cord_cervical_c-1        |
| rs9535747  | 52322184 | 0.99 | 4.78E-08 | WDFY2        | 0.27  | 1.15E-02 | Brain_Hypothalamus                    |
| rs9535747  | 52322184 | 0.99 | 4.78E-08 | WDFY2        | 0.37  | 1.43E-02 | Brain_Spinal_cord_cervical_c-1        |
| rs9535747  | 52322184 | 0.99 | 4.78E-08 | RP11-24B19.3 | 0.44  | 1.57E-02 | Brain_Amygdala                        |
| rs9535747  | 52322184 | 0.99 | 4.78E-08 | INTS6        | -0.42 | 1.65E-02 | Brain_Hippocampus                     |
| rs9535747  | 52322184 | 0.99 | 4.78E-08 | DHRS12       | -0.26 | 1.68E-02 | Brain_Hypothalamus                    |
| rs9535747  | 52322184 | 0.99 | 4.78E-08 | WDFY2        | 0.17  | 2.28E-02 | Brain_Cortex                          |
| rs9535747  | 52322184 | 0.99 | 4.78E-08 | UTP14C       | 0.20  | 2.36E-02 | Brain_Cortex                          |
| rs9535747  | 52322184 | 0.99 | 4.78E-08 | HNRNPA1L2    | 0.14  | 2.62E-02 | Whole_Blood                           |
| rs9535747  | 52322184 | 0.99 | 4.78E-08 | NEK5         | -0.22 | 2.66E-02 | Brain_Caudate_basal_ganglia           |
| rs9535747  | 52322184 | 0.99 | 4.78E-08 | DHRS12       | -0.20 | 2.92E-02 | Brain_Cerebellar_Hemisphere           |
| rs9535747  | 52322184 | 0.99 | 4.78E-08 | ALG11        | -0.25 | 2.98E-02 | Brain_Spinal_cord_cervical_c-1        |
| rs9535747  | 52322184 | 0.99 | 4.78E-08 | INTS6        | -0.40 | 3.09E-02 | Brain_Substantia_nigra                |
| rs9535747  | 52322184 | 0.99 | 4.78E-08 | UTP14C       | 0.24  | 3.12E-02 | Brain_Amygdala                        |
| rs9535747  | 52322184 | 0.99 | 4.78E-08 | MRPS31P5     | -0.17 | 3.17E-02 | Brain_Caudate_basal_ganglia           |
| rs9535747  | 52322184 | 0.99 | 4.78E-08 | THSD1        | 0.28  | 3.29E-02 | Brain_Hippocampus                     |
| rs9535747  | 52322184 | 0.99 | 4.78E-08 | ALG11        | -0.18 | 3.91E-02 | Brain_Nucleus_accumbens_basal_ganglia |
| rs9535747  | 52322184 | 0.99 | 4.78E-08 | CKAP2        | -0.25 | 3.92E-02 | Brain_Cerebellar_Hemisphere           |
| rs9535747  | 52322184 | 0.99 | 4.78E-08 | INTS6        | -0.32 | 4.19E-02 | Brain_Hypothalamus                    |
| rs9535747  | 52322184 | 0.99 | 4.78E-08 | NEK5         | -0.37 | 4.67E-02 | Brain_Spinal_cord_cervical_c-1        |
| rs73199746 | 52323602 | 1.00 | 4.78E-08 | WDFY2        | 0.22  | 9.06E-06 | Whole_Blood                           |
| rs73199746 | 52323602 | 1.00 | 4.78E-08 | WDFY2        | 0.34  | 1.41E-04 | Brain_Cerebellar_Hemisphere           |
| rs73199746 | 52323602 | 1.00 | 4.78E-08 | WDFY2        | 0.35  | 8.27E-04 | Brain_Cerebellum                      |
| rs73199746 | 52323602 | 1.00 | 4.78E-08 | WDFY2        | 0.31  | 1.26E-03 | Brain_Hippocampus                     |
| rs73199746 | 52323602 | 1.00 | 4.78E-08 | ATP7B        | -0.41 | 3.26E-03 | Brain_Cerebellum                      |
| rs73199746 | 52323602 | 1.00 | 4.78E-08 | CKAP2        | -0.33 | 4.96E-03 | Brain_Cortex                          |
| rs73199746 | 52323602 | 1.00 | 4.78E-08 | CTAGE3P      | -0.44 | 7.46E-03 | Brain_Putamen_basal_ganglia           |
| rs73199746 | 52323602 | 1.00 | 4.78E-08 | CTAGE3P      | -0.58 | 8.49E-03 | Brain_Spinal_cord_cervical_c-1        |
| rs73199746 | 52323602 | 1.00 | 4.78E-08 | ATP7B        | -0.39 | 9.87E-03 | Brain_Spinal_cord_cervical_c-1        |
| rs73199746 | 52323602 | 1.00 | 4.78E-08 | WDFY2        | 0.20  | 1.10E-02 | Brain_Cortex                          |
| rs73199746 | 52323602 | 1.00 | 4.78E-08 | WDFY2        | 0.27  | 1.15E-02 | Brain_Hypothalamus                    |
| rs73199746 | 52323602 | 1.00 | 4.78E-08 | WDFY2        | 0.37  | 1.43E-02 | Brain_Spinal_cord_cervical_c-1        |



|            |          |      |          |              |       |          |                                       |
|------------|----------|------|----------|--------------|-------|----------|---------------------------------------|
| rs73199746 | 52323602 | 1.00 | 4.78E-08 | RP11-24B19.3 | 0.44  | 1.57E-02 | Brain_Amygdala                        |
| rs73199746 | 52323602 | 1.00 | 4.78E-08 | DHRS12       | -0.26 | 1.68E-02 | Brain_Hypothalamus                    |
| rs73199746 | 52323602 | 1.00 | 4.78E-08 | MRPS31P5     | -0.18 | 2.15E-02 | Brain_Caudate_basal_ganglia           |
| rs73199746 | 52323602 | 1.00 | 4.78E-08 | UTP14C       | 0.21  | 2.23E-02 | Brain_Cortex                          |
| rs73199746 | 52323602 | 1.00 | 4.78E-08 | SERPINE3     | 0.41  | 2.51E-02 | Brain_Cortex                          |
| rs73199746 | 52323602 | 1.00 | 4.78E-08 | DHRS12       | -0.20 | 2.92E-02 | Brain_Cerebellar_Hemisphere           |
| rs73199746 | 52323602 | 1.00 | 4.78E-08 | ALG11        | -0.25 | 2.98E-02 | Brain_Spinal_cord_cervical_c-1        |
| rs73199746 | 52323602 | 1.00 | 4.78E-08 | INTS6        | -0.40 | 3.09E-02 | Brain_Substantia_nigra                |
| rs73199746 | 52323602 | 1.00 | 4.78E-08 | UTP14C       | 0.24  | 3.12E-02 | Brain_Amygdala                        |
| rs73199746 | 52323602 | 1.00 | 4.78E-08 | WDFY2        | 0.21  | 3.22E-02 | Brain_Putamen_basal_ganglia           |
| rs73199746 | 52323602 | 1.00 | 4.78E-08 | HNRNPA1L2    | 0.13  | 3.49E-02 | Whole_Blood                           |
| rs73199746 | 52323602 | 1.00 | 4.78E-08 | CKAP2        | -0.25 | 3.92E-02 | Brain_Cerebellar_Hemisphere           |
| rs73199746 | 52323602 | 1.00 | 4.78E-08 | INTS6        | -0.32 | 4.19E-02 | Brain_Hypothalamus                    |
| rs73199746 | 52323602 | 1.00 | 4.78E-08 | NEK5         | -0.37 | 4.67E-02 | Brain_Spinal_cord_cervical_c-1        |
| rs9526793  | 52327020 | 0.99 | 4.78E-08 | WDFY2        | 0.22  | 1.27E-05 | Whole_Blood                           |
| rs9526793  | 52327020 | 0.99 | 4.78E-08 | WDFY2        | 0.34  | 1.41E-04 | Brain_Cerebellar_Hemisphere           |
| rs9526793  | 52327020 | 0.99 | 4.78E-08 | WDFY2        | 0.35  | 8.27E-04 | Brain_Cerebellum                      |
| rs9526793  | 52327020 | 0.99 | 4.78E-08 | WDFY2        | 0.30  | 2.18E-03 | Brain_Hippocampus                     |
| rs9526793  | 52327020 | 0.99 | 4.78E-08 | CKAP2        | -0.34 | 2.67E-03 | Brain_Cortex                          |
| rs9526793  | 52327020 | 0.99 | 4.78E-08 | ATP7B        | -0.41 | 3.26E-03 | Brain_Cerebellum                      |
| rs9526793  | 52327020 | 0.99 | 4.78E-08 | CTAGE3P      | -0.58 | 8.49E-03 | Brain_Spinal_cord_cervical_c-1        |
| rs9526793  | 52327020 | 0.99 | 4.78E-08 | CTAGE3P      | -0.43 | 8.75E-03 | Brain_Putamen_basal_ganglia           |
| rs9526793  | 52327020 | 0.99 | 4.78E-08 | ATP7B        | -0.39 | 9.87E-03 | Brain_Spinal_cord_cervical_c-1        |
| rs9526793  | 52327020 | 0.99 | 4.78E-08 | WDFY2        | 0.27  | 1.15E-02 | Brain_Hypothalamus                    |
| rs9526793  | 52327020 | 0.99 | 4.78E-08 | WDFY2        | 0.37  | 1.43E-02 | Brain_Spinal_cord_cervical_c-1        |
| rs9526793  | 52327020 | 0.99 | 4.78E-08 | RP11-24B19.3 | 0.44  | 1.57E-02 | Brain_Amygdala                        |
| rs9526793  | 52327020 | 0.99 | 4.78E-08 | INTS6        | -0.42 | 1.65E-02 | Brain_Hippocampus                     |
| rs9526793  | 52327020 | 0.99 | 4.78E-08 | DHRS12       | -0.26 | 1.68E-02 | Brain_Hypothalamus                    |
| rs9526793  | 52327020 | 0.99 | 4.78E-08 | WDFY2        | 0.17  | 2.28E-02 | Brain_Cortex                          |
| rs9526793  | 52327020 | 0.99 | 4.78E-08 | UTP14C       | 0.20  | 2.36E-02 | Brain_Cortex                          |
| rs9526793  | 52327020 | 0.99 | 4.78E-08 | HNRNPA1L2    | 0.14  | 2.62E-02 | Whole_Blood                           |
| rs9526793  | 52327020 | 0.99 | 4.78E-08 | NEK5         | -0.22 | 2.66E-02 | Brain_Caudate_basal_ganglia           |
| rs9526793  | 52327020 | 0.99 | 4.78E-08 | DHRS12       | -0.20 | 2.92E-02 | Brain_Cerebellar_Hemisphere           |
| rs9526793  | 52327020 | 0.99 | 4.78E-08 | ALG11        | -0.25 | 2.98E-02 | Brain_Spinal_cord_cervical_c-1        |
| rs9526793  | 52327020 | 0.99 | 4.78E-08 | INTS6        | -0.40 | 3.09E-02 | Brain_Substantia_nigra                |
| rs9526793  | 52327020 | 0.99 | 4.78E-08 | UTP14C       | 0.24  | 3.12E-02 | Brain_Amygdala                        |
| rs9526793  | 52327020 | 0.99 | 4.78E-08 | MRPS31P5     | -0.17 | 3.17E-02 | Brain_Caudate_basal_ganglia           |
| rs9526793  | 52327020 | 0.99 | 4.78E-08 | THSD1        | 0.28  | 3.29E-02 | Brain_Hippocampus                     |
| rs9526793  | 52327020 | 0.99 | 4.78E-08 | ALG11        | -0.18 | 3.91E-02 | Brain_Nucleus_accumbens_basal_ganglia |
| rs9526793  | 52327020 | 0.99 | 4.78E-08 | CKAP2        | -0.25 | 3.92E-02 | Brain_Cerebellar_Hemisphere           |
| rs9526793  | 52327020 | 0.99 | 4.78E-08 | INTS6        | -0.32 | 4.19E-02 | Brain_Hypothalamus                    |

|           |          |      |          |              |       |          |                                       |
|-----------|----------|------|----------|--------------|-------|----------|---------------------------------------|
| rs9526793 | 52327020 | 0.99 | 4.78E-08 | NEK5         | -0.37 | 4.67E-02 | Brain_Spinal_cord_cervical_c-1        |
| rs9535749 | 52328844 | 1.00 | 3.37E-08 | WDFY2        | 0.20  | 3.34E-05 | Whole_Blood                           |
| rs9535749 | 52328844 | 1.00 | 3.37E-08 | WDFY2        | 0.34  | 1.07E-04 | Brain_Cerebellar_Hemisphere           |
| rs9535749 | 52328844 | 1.00 | 3.37E-08 | WDFY2        | 0.35  | 6.92E-04 | Brain_Cerebellum                      |
| rs9535749 | 52328844 | 1.00 | 3.37E-08 | CKAP2        | -0.35 | 2.16E-03 | Brain_Cortex                          |
| rs9535749 | 52328844 | 1.00 | 3.37E-08 | WDFY2        | 0.30  | 2.18E-03 | Brain_Hippocampus                     |
| rs9535749 | 52328844 | 1.00 | 3.37E-08 | ATP7B        | -0.41 | 2.73E-03 | Brain_Cerebellum                      |
| rs9535749 | 52328844 | 1.00 | 3.37E-08 | ATP7B        | -0.41 | 5.60E-03 | Brain_Spinal_cord_cervical_c-1        |
| rs9535749 | 52328844 | 1.00 | 3.37E-08 | CTAGE3P      | -0.43 | 8.75E-03 | Brain_Putamen_basal_ganglia           |
| rs9535749 | 52328844 | 1.00 | 3.37E-08 | WDFY2        | 0.27  | 1.15E-02 | Brain_Hypothalamus                    |
| rs9535749 | 52328844 | 1.00 | 3.37E-08 | CTAGE3P      | -0.55 | 1.42E-02 | Brain_Spinal_cord_cervical_c-1        |
| rs9535749 | 52328844 | 1.00 | 3.37E-08 | RP11-24B19.3 | 0.44  | 1.57E-02 | Brain_Amygdala                        |
| rs9535749 | 52328844 | 1.00 | 3.37E-08 | INTS6        | -0.42 | 1.65E-02 | Brain_Hippocampus                     |
| rs9535749 | 52328844 | 1.00 | 3.37E-08 | DHRS12       | -0.26 | 1.68E-02 | Brain_Hypothalamus                    |
| rs9535749 | 52328844 | 1.00 | 3.37E-08 | ALG11        | -0.27 | 1.68E-02 | Brain_Spinal_cord_cervical_c-1        |
| rs9535749 | 52328844 | 1.00 | 3.37E-08 | DHRS12       | -0.21 | 1.76E-02 | Brain_Cerebellar_Hemisphere           |
| rs9535749 | 52328844 | 1.00 | 3.37E-08 | HNRNPA1L2    | 0.14  | 1.78E-02 | Whole_Blood                           |
| rs9535749 | 52328844 | 1.00 | 3.37E-08 | WDFY2        | 0.17  | 2.29E-02 | Brain_Cortex                          |
| rs9535749 | 52328844 | 1.00 | 3.37E-08 | UTP14C       | 0.20  | 2.56E-02 | Brain_Cortex                          |
| rs9535749 | 52328844 | 1.00 | 3.37E-08 | NEK5         | -0.22 | 2.66E-02 | Brain_Caudate_basal_ganglia           |
| rs9535749 | 52328844 | 1.00 | 3.37E-08 | INTS6        | -0.40 | 3.09E-02 | Brain_Substantia_nigra                |
| rs9535749 | 52328844 | 1.00 | 3.37E-08 | UTP14C       | 0.24  | 3.12E-02 | Brain_Amygdala                        |
| rs9535749 | 52328844 | 1.00 | 3.37E-08 | MRPS31P5     | -0.17 | 3.17E-02 | Brain_Caudate_basal_ganglia           |
| rs9535749 | 52328844 | 1.00 | 3.37E-08 | THSD1        | 0.28  | 3.29E-02 | Brain_Hippocampus                     |
| rs9535749 | 52328844 | 1.00 | 3.37E-08 | ALG11        | -0.18 | 3.91E-02 | Brain_Nucleus_accumbens_basal_ganglia |
| rs9535749 | 52328844 | 1.00 | 3.37E-08 | NEK5         | -0.38 | 4.16E-02 | Brain_Spinal_cord_cervical_c-1        |
| rs9535749 | 52328844 | 1.00 | 3.37E-08 | INTS6        | -0.32 | 4.19E-02 | Brain_Hypothalamus                    |
| rs9535749 | 52328844 | 1.00 | 3.37E-08 | WDFY2        | 0.31  | 4.32E-02 | Brain_Spinal_cord_cervical_c-1        |
| rs9535749 | 52328844 | 1.00 | 3.37E-08 | CKAP2        | -0.24 | 4.66E-02 | Brain_Cerebellar_Hemisphere           |
| rs9535750 | 52330240 | 1.00 | 4.78E-08 | WDFY2        | 0.22  | 1.27E-05 | Whole_Blood                           |
| rs9535750 | 52330240 | 1.00 | 4.78E-08 | WDFY2        | 0.34  | 1.41E-04 | Brain_Cerebellar_Hemisphere           |
| rs9535750 | 52330240 | 1.00 | 4.78E-08 | WDFY2        | 0.35  | 8.27E-04 | Brain_Cerebellum                      |
| rs9535750 | 52330240 | 1.00 | 4.78E-08 | WDFY2        | 0.30  | 2.18E-03 | Brain_Hippocampus                     |
| rs9535750 | 52330240 | 1.00 | 4.78E-08 | CKAP2        | -0.34 | 2.67E-03 | Brain_Cortex                          |
| rs9535750 | 52330240 | 1.00 | 4.78E-08 | ATP7B        | -0.41 | 3.26E-03 | Brain_Cerebellum                      |
| rs9535750 | 52330240 | 1.00 | 4.78E-08 | CTAGE3P      | -0.58 | 8.49E-03 | Brain_Spinal_cord_cervical_c-1        |
| rs9535750 | 52330240 | 1.00 | 4.78E-08 | CTAGE3P      | -0.43 | 8.75E-03 | Brain_Putamen_basal_ganglia           |
| rs9535750 | 52330240 | 1.00 | 4.78E-08 | ATP7B        | -0.39 | 9.87E-03 | Brain_Spinal_cord_cervical_c-1        |
| rs9535750 | 52330240 | 1.00 | 4.78E-08 | WDFY2        | 0.27  | 1.15E-02 | Brain_Hypothalamus                    |
| rs9535750 | 52330240 | 1.00 | 4.78E-08 | WDFY2        | 0.37  | 1.43E-02 | Brain_Spinal_cord_cervical_c-1        |
| rs9535750 | 52330240 | 1.00 | 4.78E-08 | RP11-24B19.3 | 0.44  | 1.57E-02 | Brain_Amygdala                        |

|           |          |      |          |              |       |          |                                       |
|-----------|----------|------|----------|--------------|-------|----------|---------------------------------------|
| rs9535750 | 52330240 | 1.00 | 4.78E-08 | INTS6        | -0.42 | 1.65E-02 | Brain_Hippocampus                     |
| rs9535750 | 52330240 | 1.00 | 4.78E-08 | DHRS12       | -0.26 | 1.68E-02 | Brain_Hypothalamus                    |
| rs9535750 | 52330240 | 1.00 | 4.78E-08 | WDFY2        | 0.17  | 2.28E-02 | Brain_Cortex                          |
| rs9535750 | 52330240 | 1.00 | 4.78E-08 | UTP14C       | 0.20  | 2.36E-02 | Brain_Cortex                          |
| rs9535750 | 52330240 | 1.00 | 4.78E-08 | HNRNPA1L2    | 0.14  | 2.62E-02 | Whole_Blood                           |
| rs9535750 | 52330240 | 1.00 | 4.78E-08 | NEK5         | -0.22 | 2.66E-02 | Brain_Caudate_basal_ganglia           |
| rs9535750 | 52330240 | 1.00 | 4.78E-08 | DHRS12       | -0.20 | 2.92E-02 | Brain_Cerebellar_Hemisphere           |
| rs9535750 | 52330240 | 1.00 | 4.78E-08 | ALG11        | -0.25 | 2.98E-02 | Brain_Spinal_cord_cervical_c-1        |
| rs9535750 | 52330240 | 1.00 | 4.78E-08 | INTS6        | -0.40 | 3.09E-02 | Brain_Substantia_nigra                |
| rs9535750 | 52330240 | 1.00 | 4.78E-08 | UTP14C       | 0.24  | 3.12E-02 | Brain_Amygdala                        |
| rs9535750 | 52330240 | 1.00 | 4.78E-08 | MRPS31P5     | -0.17 | 3.17E-02 | Brain_Caudate_basal_ganglia           |
| rs9535750 | 52330240 | 1.00 | 4.78E-08 | THSD1        | 0.28  | 3.29E-02 | Brain_Hippocampus                     |
| rs9535750 | 52330240 | 1.00 | 4.78E-08 | ALG11        | -0.18 | 3.91E-02 | Brain_Nucleus_accumbens_basal_ganglia |
| rs9535750 | 52330240 | 1.00 | 4.78E-08 | CKAP2        | -0.25 | 3.92E-02 | Brain_Cerebellar_Hemisphere           |
| rs9535750 | 52330240 | 1.00 | 4.78E-08 | INTS6        | -0.32 | 4.19E-02 | Brain_Hypothalamus                    |
| rs9535750 | 52330240 | 1.00 | 4.78E-08 | NEK5         | -0.37 | 4.67E-02 | Brain_Spinal_cord_cervical_c-1        |
| rs9526794 | 52330268 | 1.00 | 4.78E-08 | WDFY2        | 0.21  | 2.15E-05 | Whole_Blood                           |
| rs9526794 | 52330268 | 1.00 | 4.78E-08 | WDFY2        | 0.34  | 1.41E-04 | Brain_Cerebellar_Hemisphere           |
| rs9526794 | 52330268 | 1.00 | 4.78E-08 | WDFY2        | 0.35  | 8.27E-04 | Brain_Cerebellum                      |
| rs9526794 | 52330268 | 1.00 | 4.78E-08 | WDFY2        | 0.30  | 2.18E-03 | Brain_Hippocampus                     |
| rs9526794 | 52330268 | 1.00 | 4.78E-08 | CKAP2        | -0.34 | 2.67E-03 | Brain_Cortex                          |
| rs9526794 | 52330268 | 1.00 | 4.78E-08 | ATP7B        | -0.41 | 3.26E-03 | Brain_Cerebellum                      |
| rs9526794 | 52330268 | 1.00 | 4.78E-08 | CTAGE3P      | -0.58 | 8.49E-03 | Brain_Spinal_cord_cervical_c-1        |
| rs9526794 | 52330268 | 1.00 | 4.78E-08 | CTAGE3P      | -0.43 | 8.75E-03 | Brain_Putamen_basal_ganglia           |
| rs9526794 | 52330268 | 1.00 | 4.78E-08 | ATP7B        | -0.39 | 9.87E-03 | Brain_Spinal_cord_cervical_c-1        |
| rs9526794 | 52330268 | 1.00 | 4.78E-08 | WDFY2        | 0.27  | 1.15E-02 | Brain_Hypothalamus                    |
| rs9526794 | 52330268 | 1.00 | 4.78E-08 | WDFY2        | 0.37  | 1.43E-02 | Brain_Spinal_cord_cervical_c-1        |
| rs9526794 | 52330268 | 1.00 | 4.78E-08 | RP11-24B19.3 | 0.44  | 1.57E-02 | Brain_Amygdala                        |
| rs9526794 | 52330268 | 1.00 | 4.78E-08 | INTS6        | -0.42 | 1.65E-02 | Brain_Hippocampus                     |
| rs9526794 | 52330268 | 1.00 | 4.78E-08 | DHRS12       | -0.26 | 1.68E-02 | Brain_Hypothalamus                    |
| rs9526794 | 52330268 | 1.00 | 4.78E-08 | WDFY2        | 0.17  | 2.28E-02 | Brain_Cortex                          |
| rs9526794 | 52330268 | 1.00 | 4.78E-08 | UTP14C       | 0.20  | 2.36E-02 | Brain_Cortex                          |
| rs9526794 | 52330268 | 1.00 | 4.78E-08 | NEK5         | -0.22 | 2.66E-02 | Brain_Caudate_basal_ganglia           |
| rs9526794 | 52330268 | 1.00 | 4.78E-08 | DHRS12       | -0.20 | 2.92E-02 | Brain_Cerebellar_Hemisphere           |
| rs9526794 | 52330268 | 1.00 | 4.78E-08 | ALG11        | -0.25 | 2.98E-02 | Brain_Spinal_cord_cervical_c-1        |
| rs9526794 | 52330268 | 1.00 | 4.78E-08 | INTS6        | -0.40 | 3.09E-02 | Brain_Substantia_nigra                |
| rs9526794 | 52330268 | 1.00 | 4.78E-08 | HNRNPA1L2    | 0.13  | 3.12E-02 | Whole_Blood                           |
| rs9526794 | 52330268 | 1.00 | 4.78E-08 | UTP14C       | 0.24  | 3.12E-02 | Brain_Amygdala                        |
| rs9526794 | 52330268 | 1.00 | 4.78E-08 | MRPS31P5     | -0.17 | 3.17E-02 | Brain_Caudate_basal_ganglia           |
| rs9526794 | 52330268 | 1.00 | 4.78E-08 | THSD1        | 0.28  | 3.29E-02 | Brain_Hippocampus                     |
| rs9526794 | 52330268 | 1.00 | 4.78E-08 | ALG11        | -0.18 | 3.91E-02 | Brain_Nucleus_accumbens_basal_ganglia |

|            |          |      |          |              |       |          |                                       |
|------------|----------|------|----------|--------------|-------|----------|---------------------------------------|
| rs9526794  | 52330268 | 1.00 | 4.78E-08 | CKAP2        | -0.25 | 3.92E-02 | Brain_Cerebellar_Hemisphere           |
| rs9526794  | 52330268 | 1.00 | 4.78E-08 | INTS6        | -0.32 | 4.19E-02 | Brain_Hypothalamus                    |
| rs9526794  | 52330268 | 1.00 | 4.78E-08 | NEK5         | -0.37 | 4.67E-02 | Brain_Spinal_cord_cervical_c-1        |
| rs17532936 | 52332745 | 1.00 | 4.78E-08 | WDFY2        | 0.22  | 1.27E-05 | Whole_Blood                           |
| rs17532936 | 52332745 | 1.00 | 4.78E-08 | WDFY2        | 0.34  | 1.41E-04 | Brain_Cerebellar_Hemisphere           |
| rs17532936 | 52332745 | 1.00 | 4.78E-08 | WDFY2        | 0.35  | 8.27E-04 | Brain_Cerebellum                      |
| rs17532936 | 52332745 | 1.00 | 4.78E-08 | WDFY2        | 0.30  | 2.18E-03 | Brain_Hippocampus                     |
| rs17532936 | 52332745 | 1.00 | 4.78E-08 | CKAP2        | -0.34 | 2.67E-03 | Brain_Cortex                          |
| rs17532936 | 52332745 | 1.00 | 4.78E-08 | ATP7B        | -0.41 | 3.26E-03 | Brain_Cerebellum                      |
| rs17532936 | 52332745 | 1.00 | 4.78E-08 | CTAGE3P      | -0.58 | 8.49E-03 | Brain_Spinal_cord_cervical_c-1        |
| rs17532936 | 52332745 | 1.00 | 4.78E-08 | CTAGE3P      | -0.43 | 8.75E-03 | Brain_Putamen_basal_ganglia           |
| rs17532936 | 52332745 | 1.00 | 4.78E-08 | ATP7B        | -0.39 | 9.87E-03 | Brain_Spinal_cord_cervical_c-1        |
| rs17532936 | 52332745 | 1.00 | 4.78E-08 | WDFY2        | 0.27  | 1.15E-02 | Brain_Hypothalamus                    |
| rs17532936 | 52332745 | 1.00 | 4.78E-08 | WDFY2        | 0.37  | 1.43E-02 | Brain_Spinal_cord_cervical_c-1        |
| rs17532936 | 52332745 | 1.00 | 4.78E-08 | RP11-24B19.3 | 0.44  | 1.57E-02 | Brain_Amygdala                        |
| rs17532936 | 52332745 | 1.00 | 4.78E-08 | INTS6        | -0.42 | 1.65E-02 | Brain_Hippocampus                     |
| rs17532936 | 52332745 | 1.00 | 4.78E-08 | DHRS12       | -0.26 | 1.68E-02 | Brain_Hypothalamus                    |
| rs17532936 | 52332745 | 1.00 | 4.78E-08 | WDFY2        | 0.17  | 2.28E-02 | Brain_Cortex                          |
| rs17532936 | 52332745 | 1.00 | 4.78E-08 | UTP14C       | 0.20  | 2.36E-02 | Brain_Cortex                          |
| rs17532936 | 52332745 | 1.00 | 4.78E-08 | HNRNPA1L2    | 0.14  | 2.62E-02 | Whole_Blood                           |
| rs17532936 | 52332745 | 1.00 | 4.78E-08 | NEK5         | -0.22 | 2.66E-02 | Brain_Caudate_basal_ganglia           |
| rs17532936 | 52332745 | 1.00 | 4.78E-08 | DHRS12       | -0.20 | 2.92E-02 | Brain_Cerebellar_Hemisphere           |
| rs17532936 | 52332745 | 1.00 | 4.78E-08 | ALG11        | -0.25 | 2.98E-02 | Brain_Spinal_cord_cervical_c-1        |
| rs17532936 | 52332745 | 1.00 | 4.78E-08 | INTS6        | -0.40 | 3.09E-02 | Brain_Substantia_nigra                |
| rs17532936 | 52332745 | 1.00 | 4.78E-08 | UTP14C       | 0.24  | 3.12E-02 | Brain_Amygdala                        |
| rs17532936 | 52332745 | 1.00 | 4.78E-08 | MRPS31P5     | -0.17 | 3.17E-02 | Brain_Caudate_basal_ganglia           |
| rs17532936 | 52332745 | 1.00 | 4.78E-08 | THSD1        | 0.28  | 3.29E-02 | Brain_Hippocampus                     |
| rs17532936 | 52332745 | 1.00 | 4.78E-08 | ALG11        | -0.18 | 3.91E-02 | Brain_Nucleus_accumbens_basal_ganglia |
| rs17532936 | 52332745 | 1.00 | 4.78E-08 | CKAP2        | -0.25 | 3.92E-02 | Brain_Cerebellar_Hemisphere           |
| rs17532936 | 52332745 | 1.00 | 4.78E-08 | INTS6        | -0.32 | 4.19E-02 | Brain_Hypothalamus                    |
| rs17532936 | 52332745 | 1.00 | 4.78E-08 | NEK5         | -0.37 | 4.67E-02 | Brain_Spinal_cord_cervical_c-1        |
| rs9535751  | 52333057 | 1.00 | 4.78E-08 | WDFY2        | 0.22  | 1.27E-05 | Whole_Blood                           |
| rs9535751  | 52333057 | 1.00 | 4.78E-08 | WDFY2        | 0.34  | 1.41E-04 | Brain_Cerebellar_Hemisphere           |
| rs9535751  | 52333057 | 1.00 | 4.78E-08 | WDFY2        | 0.35  | 8.27E-04 | Brain_Cerebellum                      |
| rs9535751  | 52333057 | 1.00 | 4.78E-08 | WDFY2        | 0.30  | 2.18E-03 | Brain_Hippocampus                     |
| rs9535751  | 52333057 | 1.00 | 4.78E-08 | CKAP2        | -0.34 | 2.67E-03 | Brain_Cortex                          |
| rs9535751  | 52333057 | 1.00 | 4.78E-08 | ATP7B        | -0.41 | 3.26E-03 | Brain_Cerebellum                      |
| rs9535751  | 52333057 | 1.00 | 4.78E-08 | CTAGE3P      | -0.58 | 8.49E-03 | Brain_Spinal_cord_cervical_c-1        |
| rs9535751  | 52333057 | 1.00 | 4.78E-08 | CTAGE3P      | -0.43 | 8.75E-03 | Brain_Putamen_basal_ganglia           |
| rs9535751  | 52333057 | 1.00 | 4.78E-08 | ATP7B        | -0.39 | 9.87E-03 | Brain_Spinal_cord_cervical_c-1        |
| rs9535751  | 52333057 | 1.00 | 4.78E-08 | WDFY2        | 0.27  | 1.15E-02 | Brain_Hypothalamus                    |

|           |          |      |          |              |       |          |                                       |
|-----------|----------|------|----------|--------------|-------|----------|---------------------------------------|
| rs9535751 | 52333057 | 1.00 | 4.78E-08 | WDFY2        | 0.37  | 1.43E-02 | Brain_Spinal_cord_cervical_c-1        |
| rs9535751 | 52333057 | 1.00 | 4.78E-08 | RP11-24B19.3 | 0.44  | 1.57E-02 | Brain_Amygdala                        |
| rs9535751 | 52333057 | 1.00 | 4.78E-08 | INTS6        | -0.42 | 1.65E-02 | Brain_Hippocampus                     |
| rs9535751 | 52333057 | 1.00 | 4.78E-08 | DHRS12       | -0.26 | 1.68E-02 | Brain_Hypothalamus                    |
| rs9535751 | 52333057 | 1.00 | 4.78E-08 | WDFY2        | 0.17  | 2.28E-02 | Brain_Cortex                          |
| rs9535751 | 52333057 | 1.00 | 4.78E-08 | UTP14C       | 0.20  | 2.36E-02 | Brain_Cortex                          |
| rs9535751 | 52333057 | 1.00 | 4.78E-08 | HNRNPA1L2    | 0.14  | 2.62E-02 | Whole_Blood                           |
| rs9535751 | 52333057 | 1.00 | 4.78E-08 | NEK5         | -0.22 | 2.66E-02 | Brain_Caudate_basal_ganglia           |
| rs9535751 | 52333057 | 1.00 | 4.78E-08 | DHRS12       | -0.20 | 2.92E-02 | Brain_Cerebellar_Hemisphere           |
| rs9535751 | 52333057 | 1.00 | 4.78E-08 | ALG11        | -0.25 | 2.98E-02 | Brain_Spinal_cord_cervical_c-1        |
| rs9535751 | 52333057 | 1.00 | 4.78E-08 | INTS6        | -0.40 | 3.09E-02 | Brain_Substantia_nigra                |
| rs9535751 | 52333057 | 1.00 | 4.78E-08 | UTP14C       | 0.24  | 3.12E-02 | Brain_Amygdala                        |
| rs9535751 | 52333057 | 1.00 | 4.78E-08 | MRPS31P5     | -0.17 | 3.17E-02 | Brain_Caudate_basal_ganglia           |
| rs9535751 | 52333057 | 1.00 | 4.78E-08 | THSD1        | 0.28  | 3.29E-02 | Brain_Hippocampus                     |
| rs9535751 | 52333057 | 1.00 | 4.78E-08 | ALG11        | -0.18 | 3.91E-02 | Brain_Nucleus_accumbens_basal_ganglia |
| rs9535751 | 52333057 | 1.00 | 4.78E-08 | CKAP2        | -0.25 | 3.92E-02 | Brain_Cerebellar_Hemisphere           |
| rs9535751 | 52333057 | 1.00 | 4.78E-08 | INTS6        | -0.32 | 4.19E-02 | Brain_Hypothalamus                    |
| rs9535751 | 52333057 | 1.00 | 4.78E-08 | NEK5         | -0.37 | 4.67E-02 | Brain_Spinal_cord_cervical_c-1        |
| rs9535752 | 52333283 | 1.00 | 4.78E-08 | WDFY2        | 0.22  | 1.27E-05 | Whole_Blood                           |
| rs9535752 | 52333283 | 1.00 | 4.78E-08 | WDFY2        | 0.34  | 1.41E-04 | Brain_Cerebellar_Hemisphere           |
| rs9535752 | 52333283 | 1.00 | 4.78E-08 | WDFY2        | 0.35  | 8.27E-04 | Brain_Cerebellum                      |
| rs9535752 | 52333283 | 1.00 | 4.78E-08 | WDFY2        | 0.30  | 2.18E-03 | Brain_Hippocampus                     |
| rs9535752 | 52333283 | 1.00 | 4.78E-08 | CKAP2        | -0.34 | 2.67E-03 | Brain_Cortex                          |
| rs9535752 | 52333283 | 1.00 | 4.78E-08 | ATP7B        | -0.41 | 3.26E-03 | Brain_Cerebellum                      |
| rs9535752 | 52333283 | 1.00 | 4.78E-08 | CTAGE3P      | -0.58 | 8.49E-03 | Brain_Spinal_cord_cervical_c-1        |
| rs9535752 | 52333283 | 1.00 | 4.78E-08 | CTAGE3P      | -0.43 | 8.75E-03 | Brain_Putamen_basal_ganglia           |
| rs9535752 | 52333283 | 1.00 | 4.78E-08 | ATP7B        | -0.39 | 9.87E-03 | Brain_Spinal_cord_cervical_c-1        |
| rs9535752 | 52333283 | 1.00 | 4.78E-08 | WDFY2        | 0.27  | 1.15E-02 | Brain_Hypothalamus                    |
| rs9535752 | 52333283 | 1.00 | 4.78E-08 | WDFY2        | 0.37  | 1.43E-02 | Brain_Spinal_cord_cervical_c-1        |
| rs9535752 | 52333283 | 1.00 | 4.78E-08 | RP11-24B19.3 | 0.44  | 1.57E-02 | Brain_Amygdala                        |
| rs9535752 | 52333283 | 1.00 | 4.78E-08 | INTS6        | -0.42 | 1.65E-02 | Brain_Hippocampus                     |
| rs9535752 | 52333283 | 1.00 | 4.78E-08 | DHRS12       | -0.26 | 1.68E-02 | Brain_Hypothalamus                    |
| rs9535752 | 52333283 | 1.00 | 4.78E-08 | WDFY2        | 0.17  | 2.28E-02 | Brain_Cortex                          |
| rs9535752 | 52333283 | 1.00 | 4.78E-08 | UTP14C       | 0.20  | 2.36E-02 | Brain_Cortex                          |
| rs9535752 | 52333283 | 1.00 | 4.78E-08 | HNRNPA1L2    | 0.14  | 2.62E-02 | Whole_Blood                           |
| rs9535752 | 52333283 | 1.00 | 4.78E-08 | NEK5         | -0.22 | 2.66E-02 | Brain_Caudate_basal_ganglia           |
| rs9535752 | 52333283 | 1.00 | 4.78E-08 | DHRS12       | -0.20 | 2.92E-02 | Brain_Cerebellar_Hemisphere           |
| rs9535752 | 52333283 | 1.00 | 4.78E-08 | ALG11        | -0.25 | 2.98E-02 | Brain_Spinal_cord_cervical_c-1        |
| rs9535752 | 52333283 | 1.00 | 4.78E-08 | INTS6        | -0.40 | 3.09E-02 | Brain_Substantia_nigra                |
| rs9535752 | 52333283 | 1.00 | 4.78E-08 | UTP14C       | 0.24  | 3.12E-02 | Brain_Amygdala                        |
| rs9535752 | 52333283 | 1.00 | 4.78E-08 | MRPS31P5     | -0.17 | 3.17E-02 | Brain_Caudate_basal_ganglia           |

|           |          |      |          |              |       |          |                                       |
|-----------|----------|------|----------|--------------|-------|----------|---------------------------------------|
| rs9535752 | 52333283 | 1.00 | 4.78E-08 | THSD1        | 0.28  | 3.29E-02 | Brain_Hippocampus                     |
| rs9535752 | 52333283 | 1.00 | 4.78E-08 | ALG11        | -0.18 | 3.91E-02 | Brain_Nucleus_accumbens_basal_ganglia |
| rs9535752 | 52333283 | 1.00 | 4.78E-08 | CKAP2        | -0.25 | 3.92E-02 | Brain_Cerebellar_Hemisphere           |
| rs9535752 | 52333283 | 1.00 | 4.78E-08 | INTS6        | -0.32 | 4.19E-02 | Brain_Hypothalamus                    |
| rs9535752 | 52333283 | 1.00 | 4.78E-08 | NEK5         | -0.37 | 4.67E-02 | Brain_Spinal_cord_cervical_c-1        |
| rs9535753 | 52335201 | 1.00 | 3.37E-08 | WDFY2        | 0.20  | 3.34E-05 | Whole_Blood                           |
| rs9535753 | 52335201 | 1.00 | 3.37E-08 | WDFY2        | 0.34  | 1.07E-04 | Brain_Cerebellar_Hemisphere           |
| rs9535753 | 52335201 | 1.00 | 3.37E-08 | WDFY2        | 0.35  | 6.92E-04 | Brain_Cerebellum                      |
| rs9535753 | 52335201 | 1.00 | 3.37E-08 | CKAP2        | -0.35 | 2.16E-03 | Brain_Cortex                          |
| rs9535753 | 52335201 | 1.00 | 3.37E-08 | WDFY2        | 0.30  | 2.18E-03 | Brain_Hippocampus                     |
| rs9535753 | 52335201 | 1.00 | 3.37E-08 | ATP7B        | -0.41 | 2.73E-03 | Brain_Cerebellum                      |
| rs9535753 | 52335201 | 1.00 | 3.37E-08 | ATP7B        | -0.41 | 5.60E-03 | Brain_Spinal_cord_cervical_c-1        |
| rs9535753 | 52335201 | 1.00 | 3.37E-08 | CTAGE3P      | -0.43 | 8.75E-03 | Brain_Putamen_basal_ganglia           |
| rs9535753 | 52335201 | 1.00 | 3.37E-08 | WDFY2        | 0.27  | 1.15E-02 | Brain_Hypothalamus                    |
| rs9535753 | 52335201 | 1.00 | 3.37E-08 | CTAGE3P      | -0.55 | 1.42E-02 | Brain_Spinal_cord_cervical_c-1        |
| rs9535753 | 52335201 | 1.00 | 3.37E-08 | RP11-24B19.3 | 0.44  | 1.57E-02 | Brain_Amygdala                        |
| rs9535753 | 52335201 | 1.00 | 3.37E-08 | INTS6        | -0.42 | 1.65E-02 | Brain_Hippocampus                     |
| rs9535753 | 52335201 | 1.00 | 3.37E-08 | DHRS12       | -0.26 | 1.68E-02 | Brain_Hypothalamus                    |
| rs9535753 | 52335201 | 1.00 | 3.37E-08 | ALG11        | -0.27 | 1.68E-02 | Brain_Spinal_cord_cervical_c-1        |
| rs9535753 | 52335201 | 1.00 | 3.37E-08 | DHRS12       | -0.21 | 1.76E-02 | Brain_Cerebellar_Hemisphere           |
| rs9535753 | 52335201 | 1.00 | 3.37E-08 | HNRNPA1L2    | 0.14  | 1.78E-02 | Whole_Blood                           |
| rs9535753 | 52335201 | 1.00 | 3.37E-08 | WDFY2        | 0.17  | 2.29E-02 | Brain_Cortex                          |
| rs9535753 | 52335201 | 1.00 | 3.37E-08 | UTP14C       | 0.20  | 2.56E-02 | Brain_Cortex                          |
| rs9535753 | 52335201 | 1.00 | 3.37E-08 | NEK5         | -0.22 | 2.66E-02 | Brain_Caudate_basal_ganglia           |
| rs9535753 | 52335201 | 1.00 | 3.37E-08 | INTS6        | -0.40 | 3.09E-02 | Brain_Substantia_nigra                |
| rs9535753 | 52335201 | 1.00 | 3.37E-08 | UTP14C       | 0.24  | 3.12E-02 | Brain_Amygdala                        |
| rs9535753 | 52335201 | 1.00 | 3.37E-08 | MRPS31P5     | -0.17 | 3.17E-02 | Brain_Caudate_basal_ganglia           |
| rs9535753 | 52335201 | 1.00 | 3.37E-08 | THSD1        | 0.28  | 3.29E-02 | Brain_Hippocampus                     |
| rs9535753 | 52335201 | 1.00 | 3.37E-08 | ALG11        | -0.18 | 3.91E-02 | Brain_Nucleus_accumbens_basal_ganglia |
| rs9535753 | 52335201 | 1.00 | 3.37E-08 | NEK5         | -0.38 | 4.16E-02 | Brain_Spinal_cord_cervical_c-1        |
| rs9535753 | 52335201 | 1.00 | 3.37E-08 | INTS6        | -0.32 | 4.19E-02 | Brain_Hypothalamus                    |
| rs9535753 | 52335201 | 1.00 | 3.37E-08 | WDFY2        | 0.31  | 4.32E-02 | Brain_Spinal_cord_cervical_c-1        |
| rs9535753 | 52335201 | 1.00 | 3.37E-08 | CKAP2        | -0.24 | 4.66E-02 | Brain_Cerebellar_Hemisphere           |
| rs2296029 | 52335765 | 0.99 | 4.78E-08 | WDFY2        | 0.22  | 1.27E-05 | Whole_Blood                           |
| rs2296029 | 52335765 | 0.99 | 4.78E-08 | WDFY2        | 0.34  | 1.41E-04 | Brain_Cerebellar_Hemisphere           |
| rs2296029 | 52335765 | 0.99 | 4.78E-08 | WDFY2        | 0.35  | 8.27E-04 | Brain_Cerebellum                      |
| rs2296029 | 52335765 | 0.99 | 4.78E-08 | WDFY2        | 0.30  | 2.18E-03 | Brain_Hippocampus                     |
| rs2296029 | 52335765 | 0.99 | 4.78E-08 | CKAP2        | -0.34 | 2.67E-03 | Brain_Cortex                          |
| rs2296029 | 52335765 | 0.99 | 4.78E-08 | ATP7B        | -0.41 | 3.26E-03 | Brain_Cerebellum                      |
| rs2296029 | 52335765 | 0.99 | 4.78E-08 | CTAGE3P      | -0.58 | 8.49E-03 | Brain_Spinal_cord_cervical_c-1        |
| rs2296029 | 52335765 | 0.99 | 4.78E-08 | CTAGE3P      | -0.43 | 8.75E-03 | Brain_Putamen_basal_ganglia           |

|           |          |      |          |              |       |          |                                       |
|-----------|----------|------|----------|--------------|-------|----------|---------------------------------------|
| rs2296029 | 52335765 | 0.99 | 4.78E-08 | ATP7B        | -0.39 | 9.87E-03 | Brain_Spinal_cord_cervical_c-1        |
| rs2296029 | 52335765 | 0.99 | 4.78E-08 | WDFY2        | 0.27  | 1.15E-02 | Brain_Hypothalamus                    |
| rs2296029 | 52335765 | 0.99 | 4.78E-08 | WDFY2        | 0.37  | 1.43E-02 | Brain_Spinal_cord_cervical_c-1        |
| rs2296029 | 52335765 | 0.99 | 4.78E-08 | RP11-24B19.3 | 0.44  | 1.57E-02 | Brain_Amygdala                        |
| rs2296029 | 52335765 | 0.99 | 4.78E-08 | INTS6        | -0.42 | 1.65E-02 | Brain_Hippocampus                     |
| rs2296029 | 52335765 | 0.99 | 4.78E-08 | DHRS12       | -0.26 | 1.68E-02 | Brain_Hypothalamus                    |
| rs2296029 | 52335765 | 0.99 | 4.78E-08 | WDFY2        | 0.17  | 2.28E-02 | Brain_Cortex                          |
| rs2296029 | 52335765 | 0.99 | 4.78E-08 | UTP14C       | 0.20  | 2.36E-02 | Brain_Cortex                          |
| rs2296029 | 52335765 | 0.99 | 4.78E-08 | HNRNPA1L2    | 0.14  | 2.62E-02 | Whole_Blood                           |
| rs2296029 | 52335765 | 0.99 | 4.78E-08 | NEK5         | -0.22 | 2.66E-02 | Brain_Caudate_basal_ganglia           |
| rs2296029 | 52335765 | 0.99 | 4.78E-08 | DHRS12       | -0.20 | 2.92E-02 | Brain_Cerebellar_Hemisphere           |
| rs2296029 | 52335765 | 0.99 | 4.78E-08 | ALG11        | -0.25 | 2.98E-02 | Brain_Spinal_cord_cervical_c-1        |
| rs2296029 | 52335765 | 0.99 | 4.78E-08 | INTS6        | -0.40 | 3.09E-02 | Brain_Substantia_nigra                |
| rs2296029 | 52335765 | 0.99 | 4.78E-08 | UTP14C       | 0.24  | 3.12E-02 | Brain_Amygdala                        |
| rs2296029 | 52335765 | 0.99 | 4.78E-08 | MRPS31P5     | -0.17 | 3.17E-02 | Brain_Caudate_basal_ganglia           |
| rs2296029 | 52335765 | 0.99 | 4.78E-08 | THSD1        | 0.28  | 3.29E-02 | Brain_Hippocampus                     |
| rs2296029 | 52335765 | 0.99 | 4.78E-08 | ALG11        | -0.18 | 3.91E-02 | Brain_Nucleus_accumbens_basal_ganglia |
| rs2296029 | 52335765 | 0.99 | 4.78E-08 | CKAP2        | -0.25 | 3.92E-02 | Brain_Cerebellar_Hemisphere           |
| rs2296029 | 52335765 | 0.99 | 4.78E-08 | INTS6        | -0.32 | 4.19E-02 | Brain_Hypothalamus                    |
| rs2296029 | 52335765 | 0.99 | 4.78E-08 | NEK5         | -0.37 | 4.67E-02 | Brain_Spinal_cord_cervical_c-1        |
| rs9535756 | 52339750 | 1.00 | 4.78E-08 | WDFY2        | 0.22  | 1.23E-05 | Whole_Blood                           |
| rs9535756 | 52339750 | 1.00 | 4.78E-08 | WDFY2        | 0.34  | 1.41E-04 | Brain_Cerebellar_Hemisphere           |
| rs9535756 | 52339750 | 1.00 | 4.78E-08 | WDFY2        | 0.35  | 8.27E-04 | Brain_Cerebellum                      |
| rs9535756 | 52339750 | 1.00 | 4.78E-08 | WDFY2        | 0.30  | 2.18E-03 | Brain_Hippocampus                     |
| rs9535756 | 52339750 | 1.00 | 4.78E-08 | CKAP2        | -0.34 | 2.67E-03 | Brain_Cortex                          |
| rs9535756 | 52339750 | 1.00 | 4.78E-08 | ATP7B        | -0.41 | 3.26E-03 | Brain_Cerebellum                      |
| rs9535756 | 52339750 | 1.00 | 4.78E-08 | CTAGE3P      | -0.58 | 8.49E-03 | Brain_Spinal_cord_cervical_c-1        |
| rs9535756 | 52339750 | 1.00 | 4.78E-08 | CTAGE3P      | -0.43 | 8.75E-03 | Brain_Putamen_basal_ganglia           |
| rs9535756 | 52339750 | 1.00 | 4.78E-08 | ATP7B        | -0.39 | 9.87E-03 | Brain_Spinal_cord_cervical_c-1        |
| rs9535756 | 52339750 | 1.00 | 4.78E-08 | WDFY2        | 0.27  | 1.15E-02 | Brain_Hypothalamus                    |
| rs9535756 | 52339750 | 1.00 | 4.78E-08 | WDFY2        | 0.37  | 1.43E-02 | Brain_Spinal_cord_cervical_c-1        |
| rs9535756 | 52339750 | 1.00 | 4.78E-08 | RP11-24B19.3 | 0.44  | 1.57E-02 | Brain_Amygdala                        |
| rs9535756 | 52339750 | 1.00 | 4.78E-08 | INTS6        | -0.42 | 1.65E-02 | Brain_Hippocampus                     |
| rs9535756 | 52339750 | 1.00 | 4.78E-08 | DHRS12       | -0.26 | 1.68E-02 | Brain_Hypothalamus                    |
| rs9535756 | 52339750 | 1.00 | 4.78E-08 | WDFY2        | 0.17  | 2.28E-02 | Brain_Cortex                          |
| rs9535756 | 52339750 | 1.00 | 4.78E-08 | HNRNPA1L2    | 0.14  | 2.31E-02 | Whole_Blood                           |
| rs9535756 | 52339750 | 1.00 | 4.78E-08 | UTP14C       | 0.20  | 2.36E-02 | Brain_Cortex                          |
| rs9535756 | 52339750 | 1.00 | 4.78E-08 | NEK5         | -0.22 | 2.66E-02 | Brain_Caudate_basal_ganglia           |
| rs9535756 | 52339750 | 1.00 | 4.78E-08 | DHRS12       | -0.20 | 2.92E-02 | Brain_Cerebellar_Hemisphere           |
| rs9535756 | 52339750 | 1.00 | 4.78E-08 | ALG11        | -0.25 | 2.98E-02 | Brain_Spinal_cord_cervical_c-1        |
| rs9535756 | 52339750 | 1.00 | 4.78E-08 | INTS6        | -0.40 | 3.09E-02 | Brain_Substantia_nigra                |

|           |          |      |          |          |       |          |                                       |
|-----------|----------|------|----------|----------|-------|----------|---------------------------------------|
| rs9535756 | 52339750 | 1.00 | 4.78E-08 | UTP14C   | 0.24  | 3.12E-02 | Brain_Amygdala                        |
| rs9535756 | 52339750 | 1.00 | 4.78E-08 | MRPS31P5 | -0.17 | 3.17E-02 | Brain_Caudate_basal_ganglia           |
| rs9535756 | 52339750 | 1.00 | 4.78E-08 | THSD1    | 0.28  | 3.29E-02 | Brain_Hippocampus                     |
| rs9535756 | 52339750 | 1.00 | 4.78E-08 | ALG11    | -0.18 | 3.91E-02 | Brain_Nucleus_accumbens_basal_ganglia |
| rs9535756 | 52339750 | 1.00 | 4.78E-08 | CKAP2    | -0.25 | 3.92E-02 | Brain_Cerebellar_Hemisphere           |
| rs9535756 | 52339750 | 1.00 | 4.78E-08 | INTS6    | -0.32 | 4.19E-02 | Brain_Hypothalamus                    |
| rs9535756 | 52339750 | 1.00 | 4.78E-08 | NEK5     | -0.37 | 4.67E-02 | Brain_Spinal_cord_cervical_c-1        |



**Figure S1.1.** MYHAT Pearson Cross-Sectional Correlation Between Cognitive Domains at Baseline

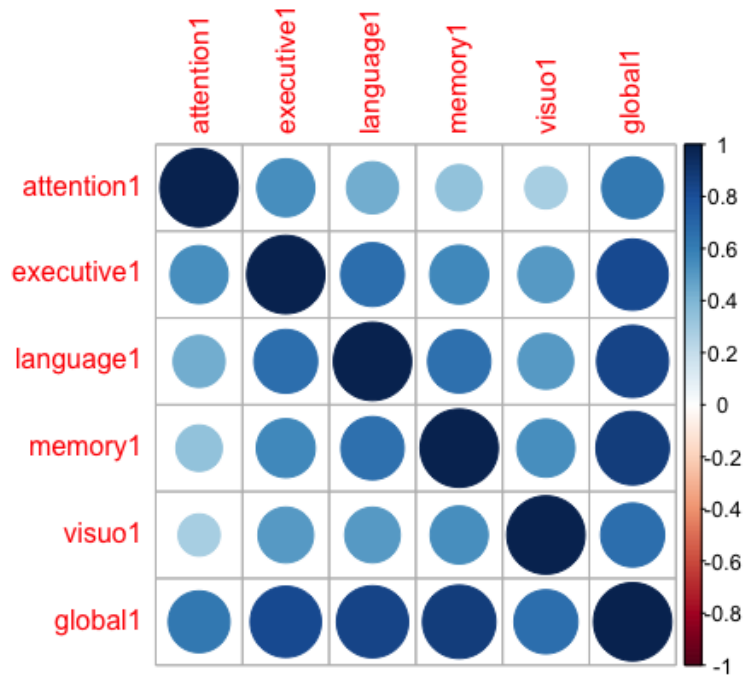

**Figure S1.2.** MoVIES Pearson Cross-Sectional Correlation Between Cognitive Domains at Baseline.

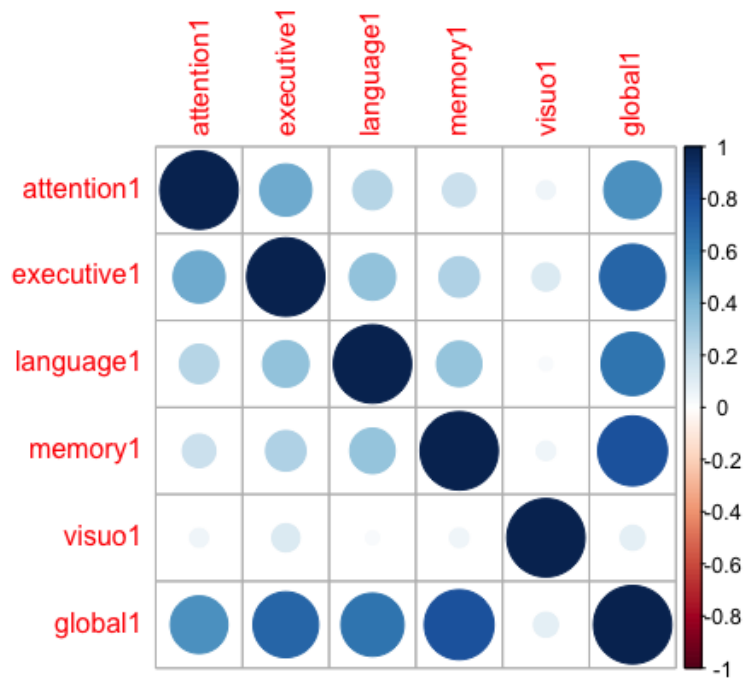

**Figure S2.** Quantile-Quantile Plots along with  $\lambda$ -values for Different cognitive Domains

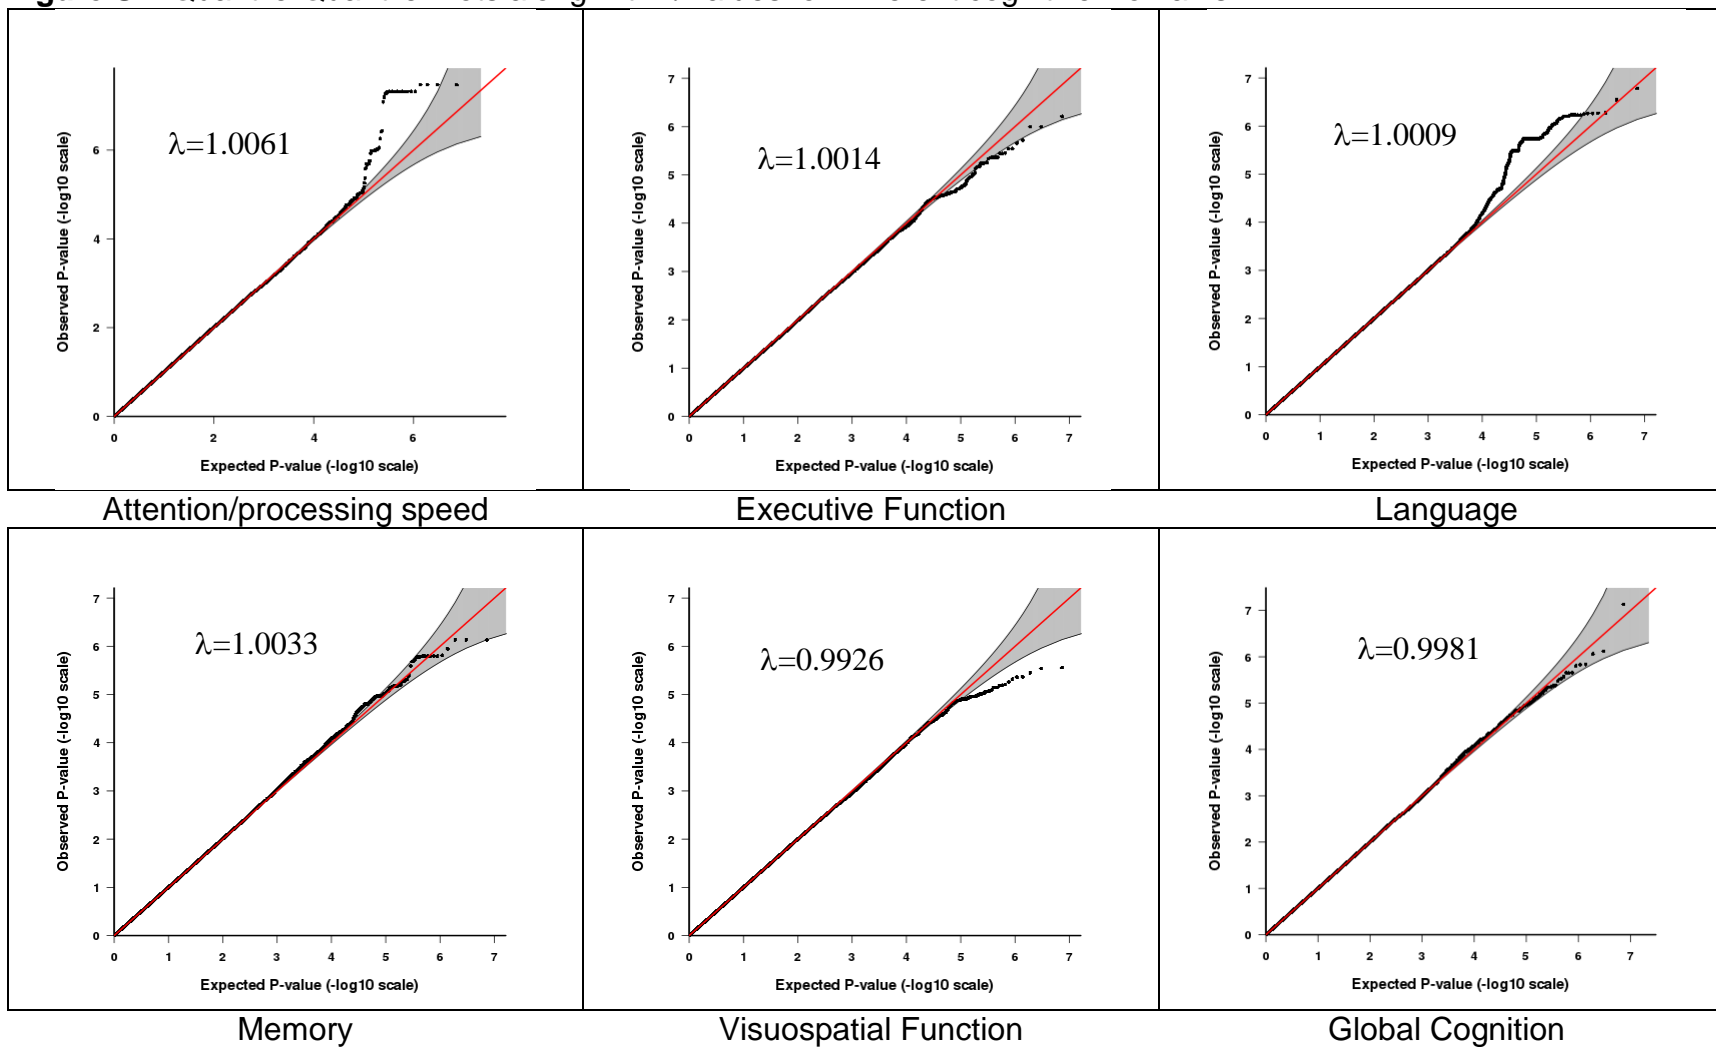

**Figure S3.1.** Manhattan Plot for the Attention/Processing Speed Domain

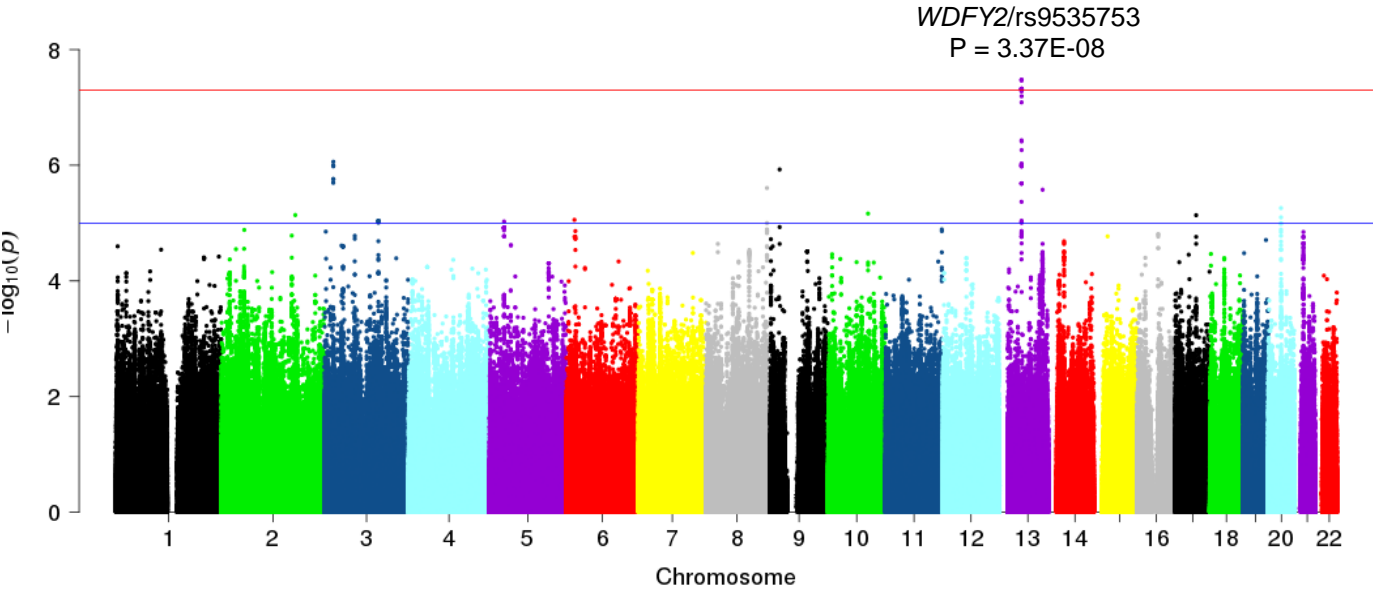

**Figure S3.2.** Manhattan Plot for the Executive Function Domain

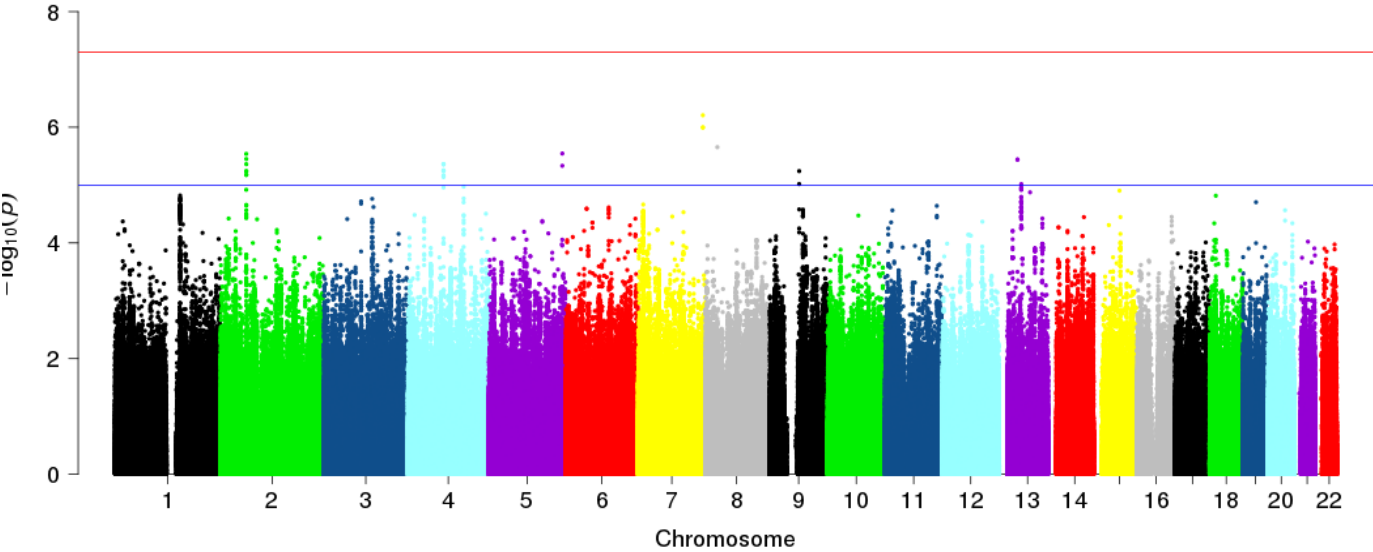

**Figure S3.3.** Manhattan Plot for the Language Domain

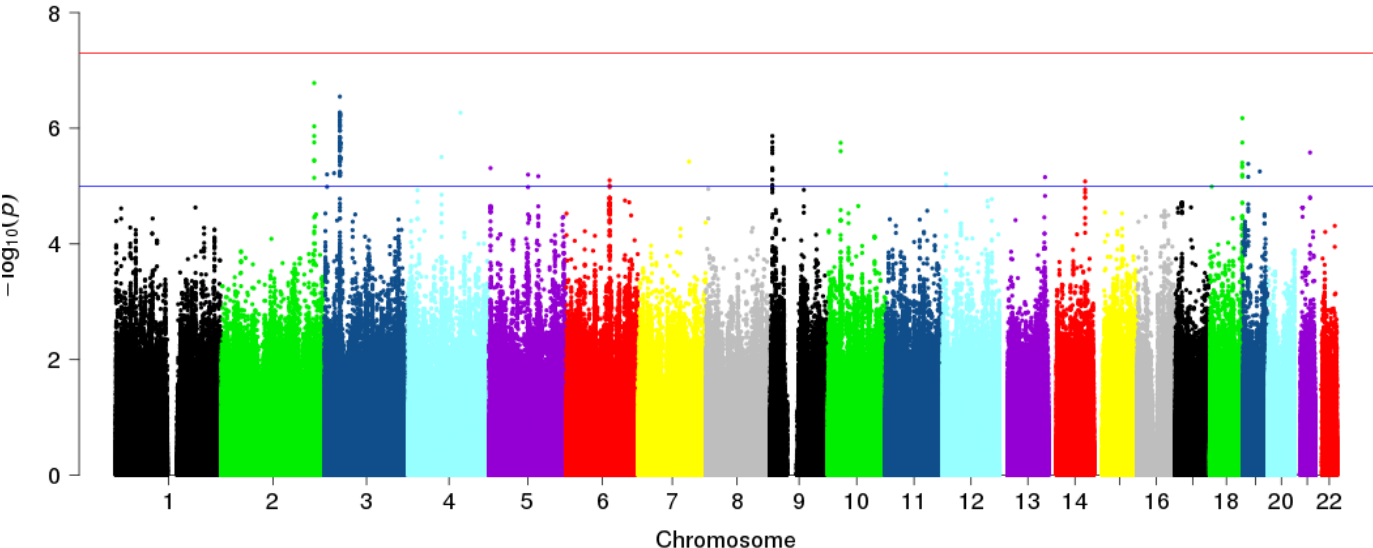

**Figure S3.4.** Manhattan Plot for the Memory Domain

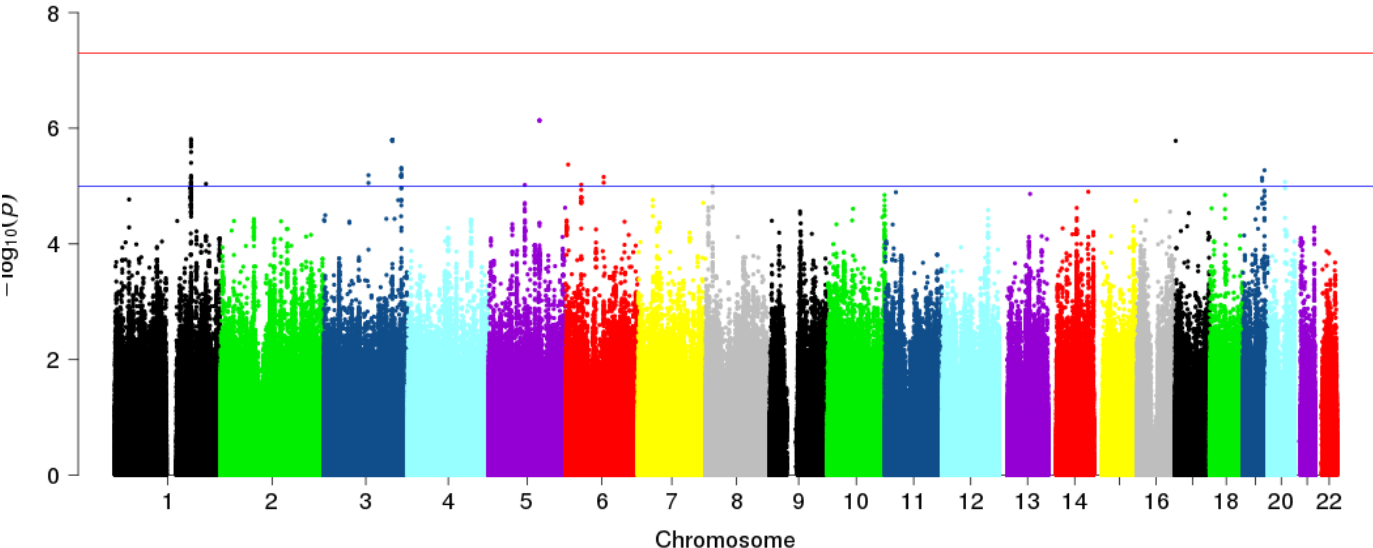

**Figure S3.5.** Manhattan Plot for the Language Domain

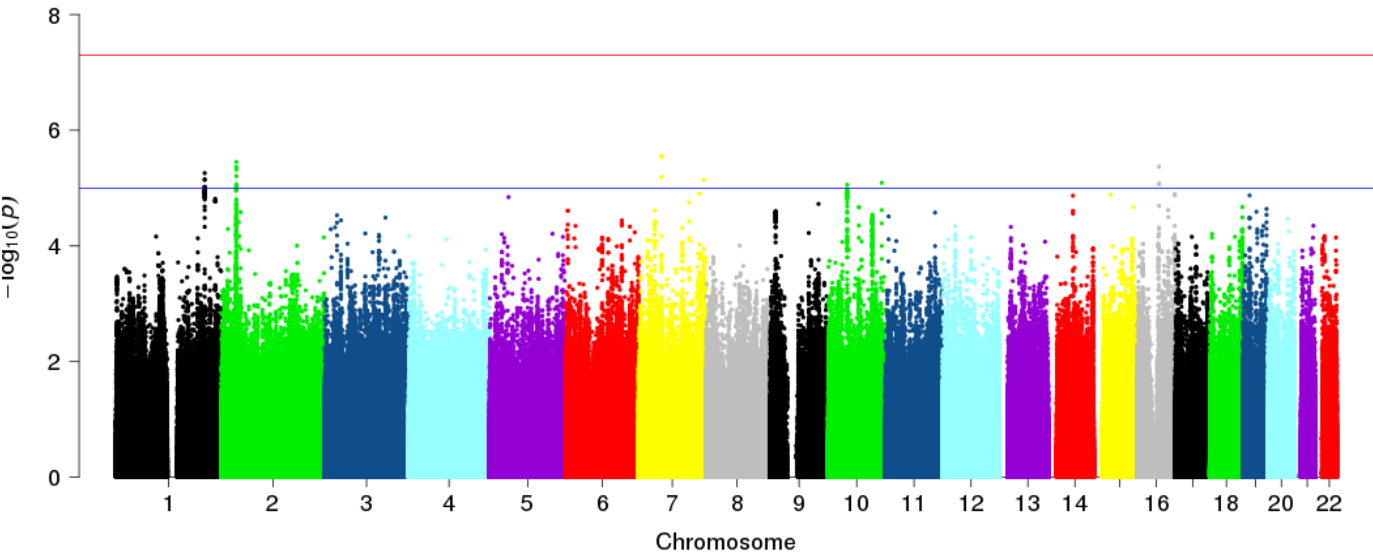

**Figure S3.6.** Manhattan Plot for the Global Cognition

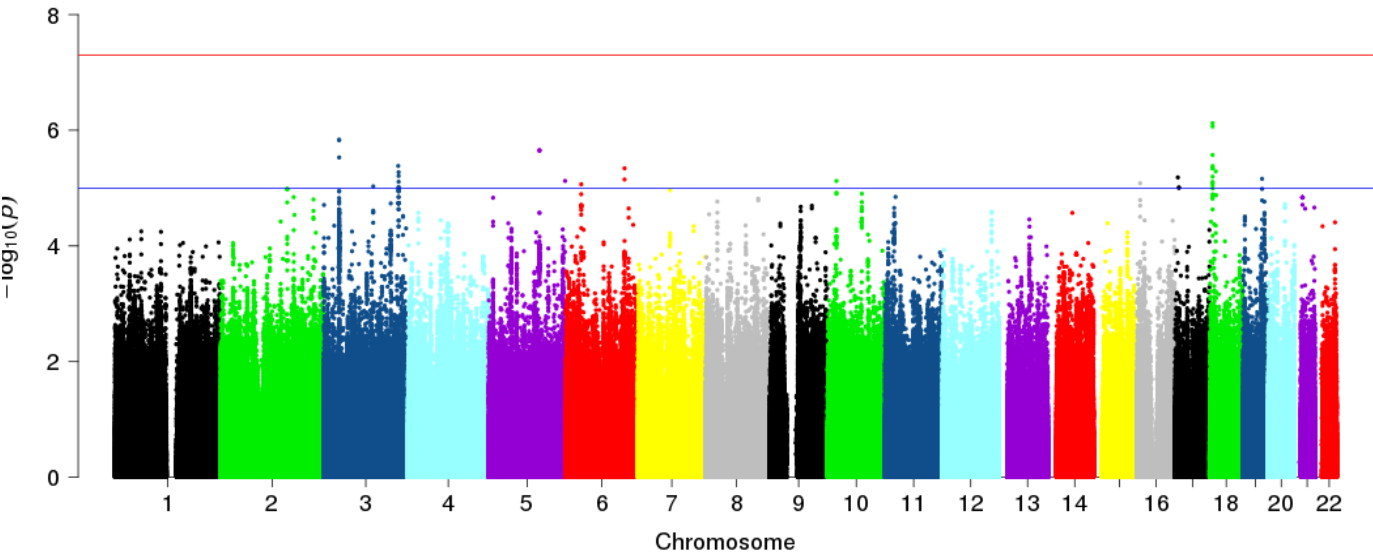

**Figure S4.** GTEx Tissue Specific Gene Expression of *WDFY2*

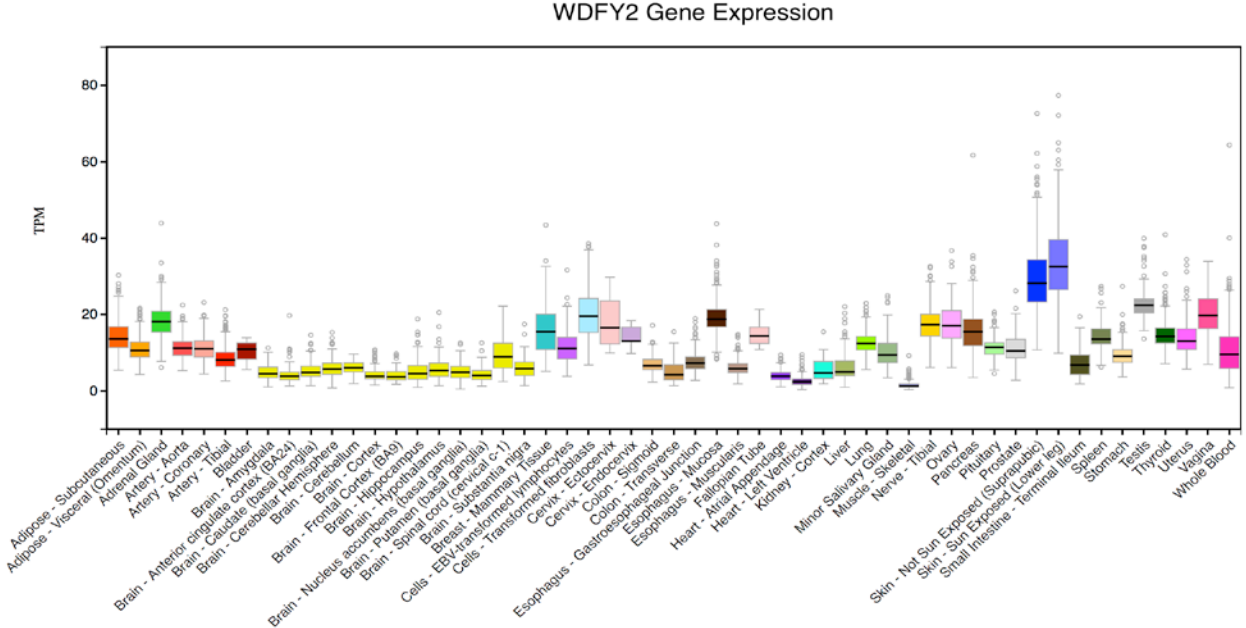

**Figure S5.** Gene expression of *WDFY2* in mouse and human brain cell types (Brain RNA-Seq <http://www.brainrnaseq.org/>)

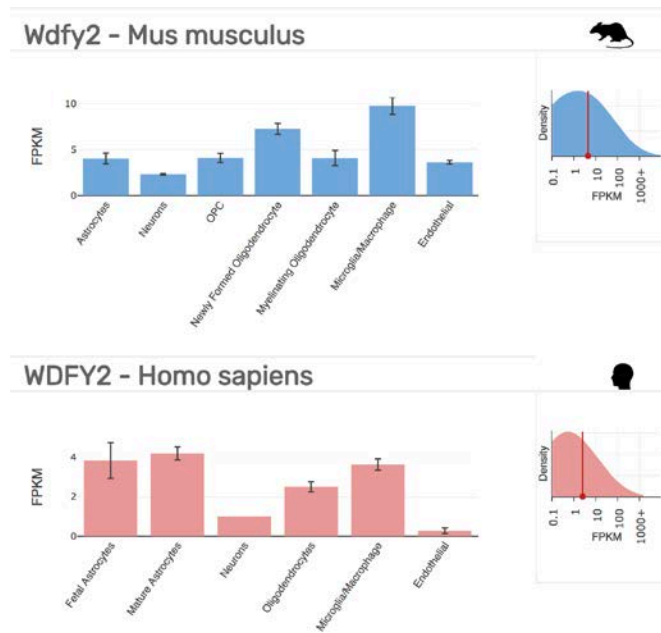

Supplement: NIHMS1524386-supplement-1.pdf [file NIHMS1524386-supplement-1.pdf]
